# Supplementary material for: Psychological well-being of women at high risk of spontaneous preterm birth cared for in a specialised preterm birth clinic: a prospective longitudinal cohort study
Source: PubMed Central journal article supplement — BMJ Open. 2022 Mar 1;12(3):e056999. doi: 10.1136/bmjopen-2021-056999 (PMC8889323; doi:10.1136/bmjopen-2021-056999), 2022-03-01
Supplement: bmjopen-2021-056999.draft_revisions.pdf [file bmjopen-2021-056999.draft_revisions.pdf]

# BMJ Open

BMJ Open is committed to open peer review. As part of this commitment we make the peer review history of every article we publish publicly available.

When an article is published we post the peer reviewers' comments and the authors' responses online. We also post the versions of the paper that were used during peer review. These are the versions that the peer review comments apply to.

The versions of the paper that follow are the versions that were submitted during the peer review process. They are not the versions of record or the final published versions. They should not be cited or distributed as the published version of this manuscript.

BMJ Open is an open access journal and the full, final, typeset and author-corrected version of record of the manuscript is available on our site with no access controls, subscription charges or pay-per-view fees (<http://bmjopen.bmj.com>).

If you have any questions on BMJ Open's open peer review process please email [info.bmjopen@bmj.com](mailto:info.bmjopen@bmj.com)

# BMJ Open

## The psychological wellbeing of women at high risk of spontaneous preterm birth cared for in a specialised preterm birth clinic: a prospective longitudinal cohort study

|                               |                                                                                                                                                                                                                                                                                                                                 |
|-------------------------------|---------------------------------------------------------------------------------------------------------------------------------------------------------------------------------------------------------------------------------------------------------------------------------------------------------------------------------|
| Journal:                      | <i>BMJ Open</i>                                                                                                                                                                                                                                                                                                                 |
| Manuscript ID                 | bmjopen-2021-056999                                                                                                                                                                                                                                                                                                             |
| Article Type:                 | Original research                                                                                                                                                                                                                                                                                                               |
| Date Submitted by the Author: | 04-Sep-2021                                                                                                                                                                                                                                                                                                                     |
| Complete List of Authors:     | Dawes, Lisa; The University of Auckland; Auckland City Hospital<br>Waugh, Jason J.S.; Auckland City Hospital; The University of Auckland, Department of Obstetrics and Gynaecology<br>Lee, Arier; University of Auckland, Section of Epidemiology and Biostatistics<br>Groom, KM; The University of Auckland, Liggins Institute |
| Keywords:                     | Maternal medicine < OBSTETRICS, Fetal medicine < OBSTETRICS, Depression & mood disorders < PSYCHIATRY                                                                                                                                                                                                                           |
|                               |                                                                                                                                                                                                                                                                                                                                 |

SCHOLARONE™  
Manuscripts

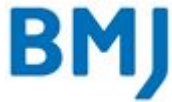

I, the Submitting Author has the right to grant and does grant on behalf of all authors of the Work (as defined in the below author licence), an exclusive licence and/or a non-exclusive licence for contributions from authors who are: i) UK Crown employees; ii) where BMJ has agreed a CC-BY licence shall apply, and/or iii) in accordance with the terms applicable for US Federal Government officers or employees acting as part of their official duties; on a worldwide, perpetual, irrevocable, royalty-free basis to BMJ Publishing Group Ltd ("BMJ") its licensees and where the relevant Journal is co-owned by BMJ to the co-owners of the Journal, to publish the Work in this journal and any other BMJ products and to exploit all rights, as set out in our [licence](#).

The Submitting Author accepts and understands that any supply made under these terms is made by BMJ to the Submitting Author unless you are acting as an employee on behalf of your employer or a postgraduate student of an affiliated institution which is paying any applicable article publishing charge ("APC") for Open Access articles. Where the Submitting Author wishes to make the Work available on an Open Access basis (and intends to pay the relevant APC), the terms of reuse of such Open Access shall be governed by a Creative Commons licence – details of these licences and which [Creative Commons](#) licence will apply to this Work are set out in our licence referred to above.

Other than as permitted in any relevant BMJ Author's Self Archiving Policies, I confirm this Work has not been accepted for publication elsewhere, is not being considered for publication elsewhere and does not duplicate material already published. I confirm all authors consent to publication of this Work and authorise the granting of this licence.

**TITLE PAGE****Full title**

The psychological wellbeing of women at high risk of spontaneous preterm birth cared for in a specialised preterm birth clinic: a prospective longitudinal cohort study

**Authors**

Lisa K. Dawes (MChB, MD)<sup>1,2</sup>

Jason J.S. Waugh (MBBS)<sup>2,3</sup>

Arier C. Lee (PhD)<sup>4</sup>

Katie M. Groom (MBBS, PhD)<sup>1,2</sup>

**Affiliations**

<sup>1</sup> Liggins Institute, The University of Auckland, Auckland, New Zealand

<sup>2</sup> National Women's Health, Auckland City Hospital, Auckland, New Zealand

<sup>3</sup> Department of Obstetrics and Gynaecology, The University of Auckland, Auckland, New Zealand

<sup>4</sup> Section of Epidemiology and Biostatistics, The University of Auckland, Auckland, New Zealand

**Contact information for corresponding author**

Lisa K. Dawes

Address: Liggins Institute, The University of Auckland, Private Bag 92019, Auckland 1142, New Zealand

Phone: +64 21 158 2076

Email: l.dawes@auckland.ac.nz

**Manuscript word count**

3384 words

**Keywords**

Spontaneous preterm birth; preterm birth clinics; anxiety; depression, prenatal care.

## ABSTRACT

**Objectives:** To assess the psychological wellbeing of pregnant women at increased risk of spontaneous preterm birth, and the impact of care from a preterm birth clinic.

**Design:** Single-centre longitudinal cohort study over one year, 2018-2019.

**Setting:** Tertiary maternity hospital in Auckland, New Zealand.

**Participants:** Pregnant women at increased risk of spontaneous preterm birth receiving care in a preterm birth clinic.

**Intervention:** Participants completed three sets of questionnaires (State-Trait Anxiety Inventory, Edinburgh Postnatal Depression Scale, 36-Item Short Form Survey) – prior to their first, after their second, and after their last clinic appointments. Study-specific questionnaires explored pregnancy-related anxiety and perceptions of care.

**Primary and secondary outcome measures:** The primary outcome was the mean state-anxiety score. Secondary outcomes included depression and quality of life measures.

**Results:** 73/97 (75.3%) eligible women participated; 41.1% had a previous preterm birth, 31.5% a second trimester loss and 28.8% cervical surgery; 20.6% had a prior mental health condition. 63/73 (86.3%) women completed all questionnaires. The adjusted mean state-anxiety score was 39.0 at baseline, which decreased to 36.5 after the second visit (difference -2.5, 95% CI -5.5 to 0.5,  $P=0.1$ ) and to 32.6 after the last visit (difference -3.9 from second visit, 95% CI -6.4 to -1.5,  $P=0.002$ ). Rates of anxiety (state-anxiety score >40) and depression (Edinburgh Postnatal Depression Scale score >12) were 38.4%, 34.8%, 19.0%, and 13.7%, 8.7%, 9.5% respectively, at the same time periods. Perceptions of care were favourable; 88.9% stated the preterm birth clinic made them significantly or somewhat less anxious and 87.3% wanted to be seen again in a future pregnancy.

**Conclusions:** Women at increased risk of spontaneous preterm birth have high rates of anxiety. Psychological wellbeing improved during the second trimester; women perceived that preterm

1  
2  
3 birth clinic care reduced pregnancy-related anxiety. These findings support the ongoing use and  
4 development of preterm birth clinics.  
5  
6  
7  
8  
9  
10  
11  
12  
13  
14  
15  
16  
17  
18  
19  
20  
21  
22  
23  
24  
25  
26  
27  
28  
29  
30  
31  
32  
33  
34  
35  
36  
37  
38  
39  
40  
41  
42  
43  
44  
45  
46  
47  
48  
49  
50  
51  
52  
53  
54  
55  
56  
57  
58  
59  
60

For peer review only

### Strengths and limitations of this study

- This is the first study to assess the psychological wellbeing of women at high risk of spontaneous preterm birth who are cared for in a specialised preterm birth clinic.
- Strengths of the study include the prospective study design, and high rates of recruitment and participant retention in an ethnically diverse group of women.
- Limitations of the study are the modest sample size, lack of a comparison group and the use of screening tools rather than diagnostic criteria for anxiety and depression,.
- Although this study demonstrates improved psychological wellbeing of women at high risk of spontaneous preterm birth, further research is required to more directly quantify the impact of a preterm birth clinic on this.

## Main Text

### INTRODUCTION

Psychological disorders are common in pregnancy.<sup>1,2</sup> Women with high risk pregnancies are more likely to suffer psychological distress with higher rates of anxiety and depression than the general pregnant population.<sup>3-5</sup> Few studies have assessed the psychological wellbeing of women who are at high risk of spontaneous preterm birth, and in particular, the potential impact of care from a specialised preterm birth clinic. Preterm birth clinics provide a package of care to asymptomatic women identified to be at increased risk based on their obstetric and gynaecological history. This care includes regular visits through the second trimester for ultrasound surveillance of cervical length and provision of treatments to prevent preterm birth such as cervical cerclage and vaginal progesterone therapy when indicated.<sup>6,7,8</sup> Close monitoring and reassurance provided through a preterm birth clinic may reduce pregnancy-related anxiety, however, it is also possible that being labelled ‘high risk’ may increase psychological distress and anxiety.<sup>9-11</sup> Further research in this area has been recommended.<sup>12</sup>

There is increasing recognition of the importance of psychological wellbeing in pregnancy. Meta-analyses show that antenatal depression is associated with a modestly increased risk of preterm birth and fetal growth restriction, and decreased rates of breastfeeding initiation.<sup>13,14</sup> The effect of anxiety is less well evaluated, but is associated with increased pregnancy-related hypertension and caesarean section, decreased rates of exclusive breastfeeding and increased anxiety in the offspring.<sup>15</sup> Antenatal anxiety and depression are also strong predictors of postnatal depression.<sup>16</sup> Strategies for prevention, along with improvements in the recognition and treatment of psychological disorders in pregnancy, are likely to improve outcomes for women and children.<sup>17</sup>

This study aims to assess rates of anxiety, depression and health-related quality of life in pregnant women at high risk of spontaneous preterm birth who are cared for in a preterm birth clinic. The primary hypothesis is that women will have less anxiety after their second consultation in a preterm birth clinic compared to before their first (baseline), and this improvement will be sustained at the end of the second trimester. Secondary hypotheses are that women will have fewer symptoms of depression, improved quality of life, and less pregnancy-related anxiety over the same period.



## MATERIAL AND METHODS

This longitudinal cohort study was carried out in a large tertiary maternity hospital in Auckland, New Zealand. All eligible women attending the preterm birth clinic over a 12 month period from August 2018 to August 2019 were invited to participate prior to their first appointment. This preterm birth clinic provides care to pregnant women perceived to be at high risk of spontaneous preterm birth and accepts local and regional referrals. Eligibility criteria for the preterm birth clinic include women with a previous spontaneous preterm birth, previous second trimester loss, history of extensive cervical surgery, or congenital uterine anomaly. Care through the preterm birth clinic includes initial assessment, risk factor modification, serial surveillance of cervical length until 24 weeks, and interventions such as vaginal progesterone and cervical cerclage when indicated (Supplementary Table 1). Care in the preterm birth clinic is provided by a specialist obstetric and midwifery team on a weekly basis, and is in addition to routine antenatal care.

Inclusion criteria for the study were gestational age  $<24^{+0}$  weeks at first visit; live fetus; eligible for preterm birth clinic review due to  $\geq 1$  risk factor for spontaneous preterm birth (Supplementary Table 1); written consent obtained; and sufficient English to independently complete questionnaires. Participants completed three sets of questionnaires: prior to their first clinic appointment (baseline, Set 1), after their second appointment (usually 2-3 weeks later, Set 2), and after their last appointment (usually at 23-24 weeks of gestation, Set 3). Three women were seen for only two appointments and returned the Set 3 questionnaires by post two weeks after their last visit. Each set of questionnaires contained three validated measures: the State-Trait Anxiety Inventory (STAI), used under licence from Mind Garden Incorporated<sup>17</sup> which contains two subscales to allow differentiation between temporary 'state-anxiety' and the relatively stable and long-standing aspects of anxiety proneness in 'trait-anxiety';<sup>18</sup> the Edinburgh Postnatal Depression Scale (EPDS) which is validated for antenatal depression;<sup>19</sup> and the RAND 36-Item Short Form Survey (SF-36) to assess health-related quality of life.<sup>20,21</sup> Set 1 and 3 also included a study-specific questionnaire to assess mental health history, social support, pregnancy-related anxiety and perceptions of care. This included free text responses on pregnancy-related anxiety triggers and what helped to relieve it (Supplementary Tables 2 and 3). The study-specific questionnaires were developed by the research team and piloted for the first five women and minor changes made based on feedback.

1  
2  
3 For the purposes of this study, state-anxiety was considered the most relevant assessment for  
4 current levels of anxiety. A screen positive result was defined as a score of >40 on the STAI  
5 state-anxiety score. Pregnancy-related anxiety was also assessed using a ten-point visual  
6 analogue scale and reported separately. In the assessment of depression, a screen positive result  
7 was defined as a score of >12 on the EPDS.  
8  
9

10  
11  
12  
13 Participants were contacted by telephone prior to their first appointment and invited to  
14 participate, and participant information and consent forms were provided in advance to  
15 interested women. After consenting, participants completed hard copy questionnaires  
16 independently using a private room, just prior to their first clinic consultation. The EPDS self-  
17 harm question was reviewed at completion and for any women answering 'yes, quite often' or  
18 'sometimes', further assessment of safety was made and referral to maternal mental health  
19 services offered. No other changes were made to clinical care. All other responses were seen  
20 only by a single investigator not responsible for decisions about referral for psychological  
21 support, until completion of the study. Standard clinic practice is described in Supplementary  
22 Table 1. At the last visit, the discharging obstetrician used pre-defined criteria developed for  
23 the purposes of this study to classify ongoing preterm birth risk. Women were considered low  
24 risk if cervical length was >25 mm with fetal fibronectin <50 ng/ml (if performed), and no  
25 intervention with vaginal progesterone or cerclage required; intermediate risk if cervical length  
26 was 11-25 mm, and/or fetal fibronectin 50-199 ng/ml, and/or there was need for progesterone  
27 or cerclage; or high risk if cervical length was <10 mm, and/or fetal fibronectin  $\geq$ 200 ng/ml  
28 (Supplementary Table 4).  
29  
30  
31  
32  
33  
34  
35  
36  
37  
38  
39  
40  
41  
42

43 Demographic details, pregnancy characteristics, medical history, and pregnancy outcomes were  
44 obtained from electronic medical records. These data, along with questionnaire responses were  
45 entered into a password-protected Excel spreadsheet by a single investigator.  
46  
47  
48  
49

50 The primary outcome was the STAI state-anxiety score. Secondary outcomes were the EPDS  
51 score, SF-36 summary quality of life scores, and pregnancy-related anxiety (as continuous  
52 measures).  
53  
54  
55

### 56 *Statistical analyses*

57 A pragmatic sample size was used. We aimed to invite all eligible women over a one year period  
58 to participate. Using data from medically high risk women,<sup>23</sup> we estimated a sample size of 60  
59  
60

1  
2  
3 would provide 80% power, with alpha of 0.05, two-sided test and an estimated within subject  
4 correlation of 0.75 to detect a decrease in the mean state-anxiety score from 40.0 (SD 12.0) to  
5 36.9.  
6  
7  
8  
9

10 Descriptive statistics were calculated using SPSS (version 25.0) and R software (version  
11 3.5.3).<sup>24,25</sup> Thematic analysis was carried out on free-text responses using Braun and Clarke  
12 methodology by a single investigator.<sup>26</sup> The mixed model for repeated measures analyses  
13 (MMRM) was used to analyse repeatedly measured continuous outcomes and conducted using  
14 SAS software (version 9.4).<sup>27</sup> This analyses was used to test for time effect adjusting for prior  
15 diagnosis of a mental health condition, gestational age at first visit and obstetric history  
16 (categorised by no previous pregnancy beyond 12 weeks; loss/preterm birth at 12-28 weeks;  
17 loss/preterm birth at 28-37 weeks; or term birth only), and subject was included as a random  
18 effect. Kenward-Roger method was used to estimate the denominator degrees of freedom for  
19 fixed effects. Two-sided P-value <0.05 determined statistical significance. All confidence  
20 intervals (CI) are given at a two-sided 95% level.  
21  
22  
23  
24  
25  
26  
27  
28  
29

### 30 *Ethical approval*

31 Ethical approval was granted by the New Zealand Health and Disability Ethics Committees  
32 (18/NTA/103) and institutional approval by the Auckland District Health Board Research  
33 Review Committee (A+8127) in July 2018.  
34  
35  
36  
37  
38

### 39 *Patient and public involvement*

40 The study-specific questionnaire was piloted amongst the first five participants, who were asked  
41 for feedback on the clarity and importance of the questions. There was no other patient  
42 involvement in the study development.  
43  
44  
45  
46  
47

## 48 **RESULTS**

49  
50  
51 The recruitment rate was 75.3% (73/97), participation is described in Figure 1. Demographics,  
52 obstetric characteristics and risk factors for preterm birth are detailed in Table 1. Some women  
53 had been seen in the clinic in a previous pregnancy (17/73, 23.3%) and/or for pre-pregnancy  
54 review (12/73, 16.4%).  
55  
56  
57  
58  
59  
60

**Table 1. Demographic details, obstetric characteristics and risk factors for preterm birth**

| Characteristic                                                                                     | Number (%) or mean (SD), n=73 |
|----------------------------------------------------------------------------------------------------|-------------------------------|
| Ethnicity                                                                                          |                               |
| European                                                                                           | 36 (49.3)                     |
| Māori                                                                                              | 7 (9.6)                       |
| Pacific                                                                                            | 5 (6.8)                       |
| Asian                                                                                              | 11 (15.1)                     |
| Indian                                                                                             | 9 (12.3)                      |
| Other                                                                                              | 5 (6.8)                       |
| Age (years)                                                                                        |                               |
| Mean                                                                                               | 34.0 (5.1)                    |
| Range                                                                                              | 22-45                         |
| Body mass index (kg/m <sup>2</sup> ) <sup>a</sup>                                                  |                               |
| Mean                                                                                               | 26.3 (6.4)                    |
| Range                                                                                              | 19-57                         |
| Current smoker                                                                                     | 5 (6.8)                       |
| Has a current partner                                                                              | 72 (98.6)                     |
| Previous diagnosis of a mental health condition (non-exclusive) <sup>b</sup>                       |                               |
| Depression                                                                                         | 10 (13.7)                     |
| Postnatal depression                                                                               | 4 (5.5)                       |
| Generalised anxiety disorder                                                                       | 2 (2.7)                       |
| Panic disorder                                                                                     | 1 (1.4)                       |
| Social anxiety disorder                                                                            | 1 (1.4)                       |
| Post-traumatic spectrum disorder                                                                   | 3 (4.1)                       |
| None                                                                                               | 58 (79.4)                     |
| Currently taking medication for a mental health condition?                                         | 4 (5.5)                       |
| Currently under the care of a psychiatrist/psychologist                                            | 1 (1.4)                       |
| Nulliparous                                                                                        | 16 (21.9)                     |
| Previous stillbirth or neonatal death $\geq 20^{+0}$ weeks                                         | 22 (30.1)                     |
| Current twin pregnancy                                                                             | 1 (1.4)                       |
| Reasons for preterm birth clinic referral (non-exclusive)                                          |                               |
| Previous spontaneous preterm birth/PPROM (24 <sup>+0</sup> to 36 <sup>+0</sup> weeks) <sup>c</sup> | 30 (41.1)                     |
| Previous second trimester loss (16 <sup>+0</sup> to 23 <sup>+6</sup> weeks)                        | 23 (31.5)                     |

|                                                                |           |
|----------------------------------------------------------------|-----------|
| Previous extensive cervical surgery <sup>d</sup>               | 21 (28.8) |
| Congenital uterine anomaly                                     | 1 (1.4)   |
| Short cervix in current pregnancy <25 mm                       | 5 (6.8)   |
| ≥2 surgical terminations and/or other uterine instrumentations | 14 (19.2) |
| Other risk factors for spontaneous preterm birth               | 4 (5.5)   |
| Multiple reasons for referral to the preterm birth clinic      | 23 (31.5) |

SD, standard deviation; mm, millimetres; PPRM, pre-labour premature rupture of membranes; LLETZ, large loop excision of the transformation zone.

<sup>a</sup> Missing data n=2.

<sup>b</sup> Self-reported.

<sup>c</sup> Includes survivors born at 23 weeks of gestation.

<sup>d</sup> LLETZ with depth of excision ≥10 mm or >1 procedure, or knife cone biopsy.

The mean gestational ages at questionnaire completion were 13<sup>+4</sup> weeks (SD 3<sup>+3</sup>), 16<sup>+2</sup> weeks (SD 3<sup>+2</sup>) and 23<sup>+6</sup> weeks (SD 1<sup>+2</sup>). Anxiety, depression and quality of life scores and proportion of screen positive results (defined as >40 on the STAI state-anxiety scale and >12 on the EPDS) are shown in Table 2. MMRM analyses, adjusting for gestation at first visit, prior mental health condition and obstetric history (fixed effects), are described in Table 3. The primary outcome of the adjusted mean state-anxiety score was 39.0 at baseline and decreased to 36.5 after the second visit (least square means difference -2.5, 95% CI -5.5 to 0.5, *P*=0.1), with a further reduction to 32.6 after the last visit (least squares means difference -3.9 from the second visit, 95% CI -6.4 to -1.5, *P*=0.002). Adjusted secondary outcomes are reported in Table 3.

**Table 2. Anxiety, depression and quality of life scores (unadjusted)**

|                                                 | Set 1 (baseline), n=73      |             | Set 2, n=69                 |             | Set 3, n=63                 |             |
|-------------------------------------------------|-----------------------------|-------------|-----------------------------|-------------|-----------------------------|-------------|
|                                                 | Mean (SD) or proportion (%) | 95% CI      | Mean (SD) or proportion (%) | 95% CI      | Mean (SD) or proportion (%) | 95% CI      |
| STAI state-anxiety score                        | 38.6 (11.9)                 | 36.8 – 41.3 | 36.2 (11.6)                 | 33.5 – 38.9 | 32.0 (9.8)                  | 29.6 – 34.4 |
| STAI state-anxiety positive screen <sup>a</sup> | 28/73 (38.4)                | 27.2 – 49.5 | 24/69 (34.8)                | 23.5 – 46.0 | 12/63 (19.0)                | 9.4 – 28.7  |
| STAI trait-anxiety score                        | 37.3 (10.1)                 | 35.0 – 39.6 | 36.5 (9.6) <sup>b</sup>     | 34.2 – 38.8 | 34.9 (10.8)                 | 32.2 – 37.6 |
| STAI trait-anxiety positive screen <sup>a</sup> | 28/73 (38.4)                | 27.2 – 49.5 | 23/68 (33.8) <sup>b</sup>   | 22.6 – 45.1 | 15/63 (23.8)                | 13.3 – 34.3 |
| EPDS score                                      | 7.3 (4.6)                   | 6.2 – 8.4   | 6.0 (4.5)                   | 4.9 – 7.1   | 5.4 (5.1)                   | 4.1 – 6.6   |
| EPDS positive screen <sup>c</sup>               | 10/73 (13.7)                | 5.8 – 21.6  | 6/69 (8.7)                  | 2.0 – 15.3  | 6/63 (9.5)                  | 2.3 – 16.8  |
| Summary mental health score <sup>d</sup>        | 63.8 (15.9) <sup>d</sup>    | 60.0 – 67.8 | 65.7 (17.0) <sup>f</sup>    | 61.5 – 69.9 | 72.4 (17.9) <sup>e</sup>    | 67.8 – 77.0 |
| Summary physical health score <sup>d</sup>      | 69.3 (21.5) <sup>c</sup>    | 64.3 – 74.3 | 66.0 (24.1) <sup>h</sup>    | 60.2 – 71.8 | 71.3 (22.7) <sup>c</sup>    | 65.6 – 77.0 |
| Pregnancy-related anxiety <sup>i</sup>          | 4.9 (2.5) <sup>c</sup>      | 4.3 – 5.5   | -                           | -           | 2.7 (2.5)                   | 2.1 – 3.3   |

STAI, State Trait Anxiety Inventory; SD, standard deviation; CI, confidence interval; EPDS, Edinburgh Postnatal Depression Scale.

<sup>a</sup> Positive screen defined as STAI score >40.

<sup>b</sup> Missing score for one woman as one incomplete question.

<sup>c</sup> Positive screen defined as EPDS >12.

<sup>d</sup> Using the RAND 36-Item Short Form Survey. Higher scores associated with better quality of life.

<sup>e</sup> Missing scores for nine women as one or more incomplete questions.

<sup>f</sup> Missing scores for five women as one or more incomplete questions.

<sup>g</sup> Missing scores for four women as one or more incomplete questions.

<sup>h</sup> Missing scores for three women as one or more incomplete questions.

<sup>i</sup> Visual analogue scale, 0 = not at all anxious, 10 = extremely anxious.

**Table 3. Mixed model for repeated measures analyses for anxiety, depression and quality of life scores**

| Fixed effect                               | STAI state-anxiety score |               |                             | EPDS score           |               |                             | Summary physical health score <sup>a</sup> |               |                             | Summary mental health score <sup>a</sup> |               |                             |
|--------------------------------------------|--------------------------|---------------|-----------------------------|----------------------|---------------|-----------------------------|--------------------------------------------|---------------|-----------------------------|------------------------------------------|---------------|-----------------------------|
|                                            | P value <sup>b</sup>     |               |                             | P value <sup>b</sup> |               |                             | P value <sup>b</sup>                       |               |                             | P value <sup>b</sup>                     |               |                             |
| Questionnaire set number                   | <0.0001                  |               |                             | 0.0001               |               |                             | 0.3                                        |               |                             | <0.0001                                  |               |                             |
| Gestation at first visit <sup>c</sup>      | 0.7                      |               |                             | 0.4                  |               |                             | 0.2                                        |               |                             | 0.2                                      |               |                             |
| Prior mental health condition <sup>c</sup> | 0.7                      |               |                             | 0.09                 |               |                             | 0.6                                        |               |                             | 0.006                                    |               |                             |
| Obstetric history <sup>c, d</sup>          | 0.4                      |               |                             | 0.04                 |               |                             | 0.8                                        |               |                             | 0.3                                      |               |                             |
| <b>Least squares means</b>                 | <b>Estimate</b>          | <b>95% CI</b> |                             | <b>Estimate</b>      | <b>95% CI</b> |                             | <b>Estimate</b>                            | <b>95% CI</b> |                             | <b>Estimate</b>                          | <b>95% CI</b> |                             |
| Set 1                                      | 39.0                     | 35.6 – 42.4   |                             | 7.5                  | 6.1 – 8.9     |                             | 70.9                                       | 63.9 – 77.8   |                             | 60.7                                     | 55.8 – 65.6   |                             |
| Set 2                                      | 36.5                     | 33.0 – 40.0   |                             | 6.3                  | 4.9 – 7.7     |                             | 67.2                                       | 60.1 – 74.4   |                             | 62.5                                     | 57.5 – 67.4   |                             |
| Set 3                                      | 32.6                     | 29.1 – 36.1   |                             | 5.7                  | 4.3 – 7.1     |                             | 71.5                                       | 64.3 – 78.6   |                             | 69.5                                     | 64.6 – 74.5   |                             |
| <b>Least squares means difference</b>      | <b>Estimate</b>          | <b>95% CI</b> | <b>P value <sup>e</sup></b> | <b>Estimate</b>      | <b>95% CI</b> | <b>P value <sup>e</sup></b> | <b>Estimate</b>                            | <b>95% CI</b> | <b>p value <sup>e</sup></b> | <b>Estimate</b>                          | <b>95% CI</b> | <b>P value <sup>e</sup></b> |
| Set 2 - 1                                  | -2.5                     | -5.5 – 0.5    | 0.1                         | -1.2                 | -2.3 – -0.2   | 0.02                        | -3.7                                       | -10.1 – 2.8   | 0.3                         | 1.8                                      | -3.1 – 6.6    | 0.5                         |
| Set 3 - 1                                  | -6.4                     | -8.8 – -4.0   | <0.0001                     | -1.8                 | -2.6 – -1.0   | <0.0001                     | 0.6                                        | -4.6 – 5.8    | 0.8                         | 8.9                                      | 4.7 – 13.0    | <0.0001                     |
| Set 3 - 2                                  | -3.9                     | -6.4 – -1.5   | 0.002                       | -0.6                 | -1.4 – 0.2    | 0.2                         | 4.2                                        | -1.1 – 9.6    | 0.1                         | 7.1                                      | -3.0 – -11.2  | 0.001                       |

STAI, State Trait Anxiety Inventory; EPDS, Edinburgh Postnatal Depression Scale; CI, confidence interval.

1  
2  
3 <sup>a</sup> RAND 36-Item Short Form Survey. Higher scores associated with better quality of life.

4  
5 <sup>b</sup> Pr > F. Type 3 tests of fixed effects.

6  
7 <sup>c</sup> Analysis adjusted for these factors.

8 <sup>d</sup> Categorised by no previous pregnancy beyond 12 weeks; loss/preterm birth at 12-28 weeks; loss/preterm birth at 28-37 weeks; or term birth only.

9  
10 <sup>e</sup> Pr > |t|

11  
12  
13  
14  
15  
16  
17  
18  
19  
20  
21  
22  
23  
24  
25  
26  
27  
28  
29  
30  
31  
32  
33  
34  
35  
36  
37  
38  
39  
40  
41  
42  
43  
44  
45  
46

For peer review only



1  
2  
3 One woman was referred to maternal mental health services following review of the EPDS self-  
4 harm question. Preterm birth clinic clinicians referred six women to the women's health social  
5 work for psychological support and two to maternal mental health services as part of routine  
6 practice. None of the women who completed the Set 3 questionnaires reported having a new  
7 diagnosis of a mental health condition during the study period made by a health practitioner.  
8 One woman declined to complete the last set of questionnaires after a diagnosis of severe  
9 depression.  
10  
11  
12  
13  
14  
15  
16

17 Women had mixed feelings about referral to the clinic prior to review, but following their last  
18 visit 56/63 (88.9%) reported care in the preterm birth clinic made them significantly or  
19 somewhat less anxious. The majority (55/63, 87.3%) would want to be cared for in a preterm  
20 birth clinic again in another pregnancy. The seven women who did not, had already had a term  
21 birth since their prior early birth, or were referred for cervical surgery or multiple uterine  
22 instrumentations only (and only one required an intervention greater than surveillance in their  
23 current pregnancy) (Supplementary Table 5).  
24  
25  
26  
27  
28  
29  
30

31 The predominant themes causing pregnancy-related anxiety at baseline were preterm birth,  
32 pregnancy loss, and concern for the baby's health. Many women were anxious about extremely  
33 early birth – *“being born too early to do anything about it,”* and were worried about reaching  
34 milestones – *“getting to 24 weeks to be deemed to have a ‘viable’ pregnancy.”* Women were  
35 worried about history repeating itself – *“I am scared that it might happen again,”* and how they  
36 would cope if it did – *“my ability to manage emotions associated with NICU [neonatal intensive  
37 care unit] if this baby is early.”* Fewer women were anxious about the risks of chromosomal or  
38 fetal anomalies.  
39  
40  
41  
42  
43  
44  
45

46 When asked at clinic discharge what they found most helpful to relieve pregnancy-related  
47 anxiety, the main theme was medical support, including close monitoring, the preterm birth  
48 clinic, regular ultrasound scans, and support and communication from doctors – *“the fortnightly  
49 visits have really helped me! Lots of reassurance,” “follow up from the preterm birth clinic,”*  
50 *“the weekly check-ups and reassurance from the doctors and how quickly they acted when there  
51 was an issue,”* and *“the support of specialists who are willing to listen.”* Other themes included  
52 support from family and friends, distraction, relaxation techniques and prayer.  
53  
54  
55  
56  
57  
58  
59  
60

The mean number of clinic visits was 5.4 (SD 2.1), range 1-11. Clinic interventions and pregnancy outcomes are reported in Table 4. Elective cervical cerclage is reserved for the highest risk women, and was performed in 17/72 cases (23.6%, excludes one woman with local follow up after the first visit as no further data collected), usually at 12-14 weeks gestation. The remaining women had ultrasound surveillance of cervical length as their primary management. The overall rate of birth <37 weeks was 17/72 (23.6%), including two spontaneous second trimester losses. One extremely early preterm birth followed pre-labour fetal demise, all other preterm births occurred following spontaneous labour or preterm pre-labour rupture of membranes. Of pregnancies that reached  $\geq 20^{+0}$  weeks 67/69 (97.1%) babies were alive at hospital discharge.

**Table 4. Preterm birth clinic interventions and pregnancy outcomes <sup>a</sup>**

| Characteristics                                                                         | Proportion (%) or mean (SD) |
|-----------------------------------------------------------------------------------------|-----------------------------|
| Shortest transvaginal cervical length measurement                                       |                             |
| Mean (SD) (in mm)                                                                       | 27.0 (9.1)                  |
| Range (in mm)                                                                           | 0-39                        |
| Number <25 mm (threshold for intervention)                                              | 21/72 (29.2)                |
| Treatments given to reduce the risk of preterm birth                                    |                             |
| Cervical cerclage only                                                                  | 16/72 (22.2)                |
| Vaginal progesterone only                                                               | 4/72 (5.6)                  |
| Both cervical cerclage and vaginal progesterone                                         | 10/72 (13.9)                |
| No treatment                                                                            | 40/72 (55.6)                |
| Antenatal hospital admission from clinic due to preterm birth risk                      | 2/72 (2.8)                  |
| Risk of preterm birth for those who had an exit visit <sup>b</sup>                      |                             |
| Low                                                                                     | 45/66 (68.2)                |
| Intermediate                                                                            | 18/66 (27.3)                |
| High                                                                                    | 3/66 (4.5)                  |
| Pregnancy outcome                                                                       |                             |
| Termination of pregnancy for fetal anomalies                                            | 2/72 (2.8)                  |
| First trimester miscarriage (<13 <sup>+0</sup> weeks)                                   | 1/72 (1.4)                  |
| Second trimester loss (13 <sup>+1</sup> to 22 <sup>+6</sup> weeks)                      | 2/72 (2.8)                  |
| Extremely early preterm birth (23 <sup>+0</sup> to 27 <sup>+6</sup> weeks) <sup>d</sup> | 3/72 (4.2)                  |
| Very early preterm birth (28 <sup>+0</sup> to 31 <sup>+6</sup> weeks)                   | 1/72 (1.4)                  |

|                                                                                   |              |
|-----------------------------------------------------------------------------------|--------------|
| Moderate to late preterm birth (32 <sup>+0</sup> to 36 <sup>+6</sup> weeks)       | 11/72 (15.3) |
| Term birth ( $\geq 37^{+0}$ weeks)                                                | 52/72 (72.2) |
| Mode of birth for pregnancies that reached $\geq 20^{+0}$ weeks <sup>e</sup>      |              |
| Normal vaginal birth                                                              | 44/68 (64.7) |
| Instrumental birth                                                                | 7/68 (10.3)  |
| Caesarean section                                                                 | 17/68 (25.0) |
| Neonatal outcome for pregnancies that reached $\geq 20^{+0}$ weeks <sup>e f</sup> |              |
| Alive at hospital discharge                                                       | 67/69 (97.1) |
| Early neonatal death                                                              | 1/69 (1.4)   |
| Stillbirth                                                                        | 1/69 (1.4)   |

<sup>a</sup> Excluding one with all follow up at local hospital after first visit as no further data collected.

<sup>b</sup> Risk assessment defined in Supplementary Table 4. Quantitative fetal fibronectin was included in 29/66 (44%) cases. Excludes six women who did not have an exit appointment. Includes three women who did not complete Set 3 questionnaires – for two the exit visit was their second visit, both were high risk and delivered prior to planned completion of the Set 3 questionnaires by post; and one who declined.

<sup>d</sup> Includes one pre-labour fetal demise.

<sup>e</sup> Excluding one termination of pregnancy  $>20$  weeks.

<sup>f</sup> Includes one set of twins.

## DISCUSSION

This is the first study to assess the psychological wellbeing of women receiving care in a specialised preterm birth clinic. It identifies high rates of psychological distress, with 38.4% and 13.7% of women having significant symptoms of anxiety and depression, respectively, at the beginning of the second trimester. Whilst the change in mean state-anxiety scores after two clinic visits did not reach statistical significance, improvement may still be clinically important. Adjusted mean state-anxiety scores were significantly improved by clinic discharge, with rates of anxiety half that of baseline. Although depression was less common than anxiety, the adjusted mean EPDS score improved by the second clinic visit and this was sustained to the end of the second trimester. Quality of life improved with regard to mental health, but not physical health. Pregnancy-related anxiety scores also improved and women perceived care in the preterm birth clinic to be a significant factor in relieving anxiety.

1  
2  
3 A number of studies have reported rates of anxiety and depression in pregnancy, with a wide  
4 range of estimates.<sup>1,2</sup> In systematic review, the overall prevalence of a clinical diagnosis of an  
5 anxiety disorder in pregnancy was 15.2%, with rates of self-reported anxiety of 18.2%, 19.1%  
6 and 24.6% in the first, second and third trimesters respectively.<sup>2</sup> Women with high risk  
7 pregnancies have higher rates of anxiety than low risk women; 45.0% vs 16.7% in one study.<sup>23</sup>  
8 Rates of depression were 7.4%, 12.8% and 12.0% in the general pregnant population in the  
9 first, second and third trimesters,<sup>1</sup> and ranged from 11% to 28% in studies on high risk  
10 pregnancies.<sup>3,4,23,28,29</sup> The high rates of anxiety seen in our study are consistent with published  
11 literature for high risk pregnancies with rates of depression in the lower range of those  
12 previously reported.  
13  
14  
15  
16  
17  
18  
19  
20  
21

22 Although we do not have data for the whole pregnancy, it seems that gestational changes in  
23 rates of anxiety in women at high risk of spontaneous preterm birth may not follow the same  
24 trends as in the general pregnant population in which rates rise throughout pregnancy.<sup>2</sup> In our  
25 study, anxiety was highest at the beginning of the second trimester and then decreased to levels  
26 similar to those seen in general pregnant populations by the end of the second trimester. This  
27 may be due to reduced anxiety over second trimester loss once this gestational time period is  
28 complete (31.5% of our cohort had experienced a second trimester loss previously). However,  
29 advancing gestation is unlikely to be the sole factor in anxiety levels returning to those of the  
30 general pregnant population, as the risk of early preterm birth was still ongoing at the time of  
31 last clinic visit. This, along with women's perception of care, suggests that preterm birth clinic  
32 care may have had a role in improving psychological wellbeing. The provision of an overall  
33 ongoing risk assessment at the final clinic visit is likely to be beneficial; the majority of women  
34 were considered to have a relatively low ongoing risk of preterm birth and encouraged to return  
35 to a low risk model of maternity care.  
36  
37  
38  
39  
40  
41  
42  
43  
44  
45  
46  
47

48 Whilst there is some evidence that simply labelling a pregnancy 'high risk' may increase  
49 anxiety and fear, other studies identified that women embrace this label in a positive way.<sup>10,11</sup>  
50 A qualitative study has assessed women's perceptions of care in a preterm birth clinic in the  
51 United Kingdom, with all women viewing their high risk status positively.<sup>11</sup> These women  
52 reported that regular reassurance from the clinic was a helpful coping strategy and that other  
53 health professionals were not always sensitive to their worries about having another preterm  
54 birth.<sup>11</sup> Our results are consistent with these findings.  
55  
56  
57  
58  
59  
60

1  
2  
3 Preterm birth clinics offer individualised, coordinated and evidence-based care with the aim of  
4 reducing spontaneous preterm birth and improving perinatal outcome. Any potential to reduce  
5 psychological distress is an additional benefit. Further research should aim to include a  
6 comparison group to more directly quantify the effect of preterm birth clinics in improving  
7 psychological wellbeing. A larger sample size would also be required to direct practice change  
8 if considering the psychological, as well as clinical, benefit of preterm birth clinics. However  
9 the new knowledge from our study should reassure clinicians and policy makers that preterm  
10 birth clinics do not seem to cause psychological harm.  
11  
12  
13  
14  
15  
16  
17  
18

19 Symptoms of anxiety and depression were under-recognised by clinicians in this study, with  
20 low referral rates for psychological support or maternal mental health review based on usual  
21 indications. Early recognition of anxiety and depression with provision of support or referral  
22 for other interventions may reduce maternal morbidity and improve pregnancy outcomes, and  
23 is likely to reduce the risk of postnatal depression.<sup>30</sup> Our findings suggest there are currently  
24 missed opportunities for care and preterm birth clinics should ensure they have referral  
25 pathways and access to psychological assessment and support, or should incorporate this into  
26 part of standard care within the clinic.  
27  
28  
29  
30  
31  
32  
33

34 The main limitations of our study are the lack of a comparison group and modest sample size.  
35 The most appropriate comparison is with women of similar preterm birth risk who do not  
36 receive care in a preterm birth clinic; however, withholding clinic care is not possible when a  
37 clinic is well established within an area and available to all. Use of the general population or a  
38 medically high risk group as a comparator is not appropriate as background anxiety levels for  
39 these women may increase over gestation due to increasing risk of other pregnancy  
40 complications, whereas the risk of preterm birth decreases with advancing gestation. Sample  
41 size was directed by the duration of the study and the number of women referred to the preterm  
42 birth clinic over the 12 month period. We are aware that not all women eligible for the clinic  
43 (and therefore for the study) were referred during this time period, and the women seen may  
44 have a higher risk profile than those who were eligible but not referred.  
45  
46  
47  
48  
49  
50  
51  
52  
53

54 A further limitation is the use of screening tests rather than diagnostic criteria for anxiety and  
55 depression. Whilst diagnostic interviews are the gold standard, they are time consuming, require  
56 special training and are expensive.<sup>31</sup> Screening tests are reliable and have been validated for use  
57 in pregnancy.<sup>28,32-38</sup> The STAI with a cut-off >40 has a sensitivity of 81% and specificity of  
58  
59  
60

1  
2  
3 80% for diagnosis of an anxiety disorder in pregnancy when compared to DSM-IV criteria.<sup>39</sup>  
4  
5 The EPDS is also accurate, with a cut-off of >12 used in pregnancy, giving a sensitivity of 83%  
6 and specificity of 90% for detection of major depression.<sup>40</sup> Participant dropout may have  
7 influenced the study outcome as the majority were due to pregnancy loss or extremely early  
8 preterm birth, and these women may have had the highest risk pregnancies and hence highest  
9 levels of psychological distress. However, unadjusted analysis of only the 63 women who  
10 completed all assessments showed similar results to those presented here.  
11  
12  
13  
14  
15  
16

17 Strengths of this study include longitudinal assessment of a high risk cohort with a high  
18 recruitment rate in an ethnically diverse group of women. Although undertaken at a single site,  
19 referrals are accepted from the wider region, improving generalisability of results. There were  
20 multiple clinicians working in the clinic over the study period (two lead obstetricians, three  
21 senior obstetric trainees, and three specialist midwives), so an individual clinician is unlikely  
22 to have had significant influence over outcomes. Variation in practice between preterm birth  
23 clinics has been recognised as an issue,<sup>41,42</sup> however the general principles of care identified by  
24 women as factors that reduced anxiety i.e. close surveillance and regular ultrasound scans, are  
25 similar across clinics globally.  
26  
27  
28  
29  
30  
31  
32  
33

## 34 CONCLUSION

35  
36  
37 Women at increased risk of spontaneous preterm birth have high rates of anxiety in early  
38 pregnancy. Improvements in psychological wellbeing were seen during the time these women  
39 were cared for in a specialised preterm birth clinic through the second trimester. Women's  
40 perceptions of a preterm birth clinic were favourable and they attributed the care received as  
41 being a significant factor in reducing pregnancy-related anxiety. Findings of this study support  
42 the ongoing use and development of these specialised clinics.  
43  
44  
45  
46  
47  
48  
49  
50  
51  
52  
53  
54  
55  
56  
57  
58  
59  
60

## FIGURE LEGEND

### Figure 1. Participant recruitment and study flow diagram

TOP, termination of pregnancy.

<sup>a</sup> Reasons not eligible: 19 were pre-pregnancy consultations, 2 had previously participated in study (both with pregnancy losses), 9 had insufficient English (including one who provided consent but was then identified to have insufficient written English when attempted first set of questionnaires and was withdrawn from the study), 3 were >24 weeks at first visit, and 12 had a single visit planned only.

<sup>b</sup> Distressed with new diagnosis of severe hypertension and fetal growth restriction, subsequently had fetal demise before last visit.

<sup>c</sup> Gestational ages at delivery 16<sup>+1</sup>, 22<sup>+3</sup>, 23<sup>+4</sup> and 24<sup>+4</sup> weeks.

<sup>d</sup> Recent diagnosis of severe depression with acute distress.

### **Acknowledgements**

The authors would like to acknowledge the women who participated in this study and the midwifery and clerical staff at National Women's Health who provided administrative support.

### **Competing interests statement**

None of the authors have any competing interests to declare.

### **Funding statement**

This work was supported by the Auckland Medical Research Foundation Ruth Spencer Fellowship (no grant number), Mercia Barnes Trust (no grant number) and Hugo Charitable Trust (grant number 3715802).

### **Data sharing statement**

Not applicable.

### **Contribution to authorship**

All authors fulfil the authorship requirements described by the International Committee of Medical Journal Editors. LD was the lead investigator and was responsible for writing the first draft of the study protocol, obtaining ethical approval, the majority of data collection and analysis and wrote the first draft of the manuscript. KG was the supervising investigator, she conceived the idea for the study and provided substantial contribution to the study protocol, ethical approvals, analysis and interpretation of results. AL made substantial contributions to the statistical analyses and interpretation of results. JW made substantial contributions to the study design and interpretation of results. All authors critically reviewed the manuscript and approved the final version of the manuscript submitted for publication.



## References

1. Bennett HA, Einarson A, Taddio A, et al. Prevalence of depression during pregnancy: Systematic review. *Obstet Gynecol.* 2004;103(4):698-709.
2. Dennis C-L, Falah-Hassani K, Shiri R. Prevalence of antenatal and postnatal anxiety: Systematic review and meta-analysis. *Br J Psychiatry.* 2017;210(5):315-23.
3. Dagklis T, Tsakiridis I, Chouliara F, et al. Antenatal depression among women hospitalized due to threatened preterm labor in a high-risk pregnancy unit in Greece. *J Matern Fetal Neonatal Med.* 2018;31(7):919-25.
4. Thiagayson P, Krishnaswamy G, Lim ML, et al. Depression and anxiety in Singaporean high-risk pregnancies: Prevalence and screening. *Gen Hosp Psychiatry.* 2013;35(2):112-6.
5. Fairbrother N, Young AH, Zhang A, et al. The prevalence and incidence of perinatal anxiety disorders among women experiencing a medically complicated pregnancy. *Arch Womens Ment Health.* 2017;20(2):311-9.
6. Vernet G, Watson H, Ridout A, et al. The role of PTB clinics: A review of the screening methods, interventions and evidence for preterm birth surveillance clinics for high-risk asymptomatic women. *Womens Health Bulletin.* 2017;4(4):2-9.
7. National Institute for Health and Care Excellence. Preterm Labour and Birth 2015. Available from: <https://www.nice.org.uk/guidance/ng25/resources/preterm-labour-and-birth-pdf-1837333576645>.
8. Jin W, Hughes K, Sim S, et al. The contemporary value of dedicated preterm birth clinics for high-risk singleton pregnancies: fifteen-year outcomes from a laeding maternal centre. *J Perinat Med.* Published online first: 20 May 2021. doi:10.1515/jpm-2021-0020.
9. Stahl K, Hundley V. Risk and risk assessment in pregnancy; do we scare because we care? *Midwifery.* 2003;19(4):298-309.
10. Simmons HA, Goldberg LS. 'High-risk' pregnancy after perinatal loss: Understanding the label. *Midwifery.* 2011;27(4):452-7.
11. O'Brien ET, Quenby S, Lavender T. Women's views of high risk pregnancy under threat of preterm birth. *Sex Reprod Healthc.* 2010;1(3):79-84.
12. Malouf R, Redshaw M. Specialist antenatal clinics for women at high risk of preterm birth: A systematic review of qualitative and quantitative research. *BMC Pregnancy Childbirth.* 2017;17(1):51.

13. Grigoriadis S, VonderPorten EH, Mamisashvili L, et al. The impact of maternal depression during pregnancy on perinatal outcomes: A systematic review and meta-analysis. *J Clin Psychiatry*. 2013;74(4):e321-41.
14. Grote NK, Bridge JA, Gavin AR, et al. A meta-analysis of depression during pregnancy and the risk of preterm birth, low birth weight, and intrauterine growth restriction. *Arch Gen Psychiatry*. 2010;67(10):1012-24.
15. Field T. Prenatal anxiety effects: A review. *Infant Behav Dev*. 2017;49:120-8.
16. Robertson E, Grace S, Wallington T, et al. Antenatal risk factors for postpartum depression: A synthesis of recent literature. *Gen Hosp Psychiatry*. 2004;26(4):289-95.
17. Giardinelli L, Innocenti A, Benni L, et al. Depression and anxiety in perinatal period: Prevalence and risk factors in an Italian sample. *Arch Womens Ment Health*. 2012;15(1):21-30.
18. Mind Garden. State-Trait Anxiety Inventory for Adults: Mind Garden; 2018 [Available from: <https://www.mindgarden.com/145-state-trait-anxiety-inventory-for-adults>].
19. Spielberger C, Gorsuch R, Lushene R. STAI: Manual for the State-Trait Anxiety Inventory (STAI). California: Consulting Psychologists Press; 1970.
20. Cox JL, Holden JM, Sagovsky R. Detection of postnatal depression: Development of the 10-item edinburgh postnatal depression scale. *Br J Psychiatry*. 1987;150(6):782-6.
21. Ware JE, Sherbourne CD. The MOS 36-Item Short-Form Health Survey (SF-36): I. Conceptual framework and item selection. *Med Care*. 1992;30(6):473-83.
22. RAND Corporation. 36-Item Short Form Survey (SF-36) 2018 [Available from: [https://www.rand.org/health/surveys\\_tools/mos/36-item-short-form.html](https://www.rand.org/health/surveys_tools/mos/36-item-short-form.html)].
23. King NMA, Chambers J, O'Donnell K, et al. Anxiety, depression and saliva cortisol in women with a medical disorder during pregnancy. *Arch Womens Ment Health*. 2010;13(4):339-45.
24. IBM Corp. IBM SPSS Statistics for Windows. 25.0 ed. New York: IBM Corp; 2017.
25. R Core Team. R: A language and environment for statistical computing. 3.5.3 ed. Vienna, Austria: R Foundation for Statistical Computing; 2019.
26. Braun V, Clarke V. Using thematic analysis in psychology. *Qualitative Research in Psychology*. 2006;3(2):77-101.
27. SAS Institute. SAS Software. 9.4 ed. Cary, NC: SAS Institute; 2017.
28. Adouard F, Glangeaud-Freudenthal NMC, Golse B. Validation of the Edinburgh Postnatal Depression Scale (EPDS) in a sample of women with high-risk pregnancies in France. *Arch Womens Ment Health*. 2005;8(2):89-95.

- 1
  - 2
  - 3
  - 4
  - 5
  - 6
  - 7
  - 8
  - 9
  - 10
  - 11
  - 12
  - 13
  - 14
  - 15
  - 16
  - 17
  - 18
  - 19
  - 20
  - 21
  - 22
  - 23
  - 24
  - 25
  - 26
  - 27
  - 28
  - 29
  - 30
  - 31
  - 32
  - 33
  - 34
  - 35
  - 36
  - 37
  - 38
  - 39
  - 40
  - 41
  - 42
  - 43
  - 44
  - 45
  - 46
  - 47
  - 48
  - 49
  - 50
  - 51
  - 52
  - 53
  - 54
  - 55
  - 56
  - 57
  - 58
  - 59
  - 60
29. Brandon AR, Trivedi MH, Hynan LS, et al. Prenatal depression in women hospitalized for obstetric risk. *J Clin Psychiatry*. 2008;69(4):635-43.
30. Austin M. Antenatal screening and early intervention for “perinatal” distress, depression and anxiety: where to from here? *Arch Womens Ment Health*. 2004;7(1):1-6.
31. Evans K, Spiby H, Morrell CJ. A psychometric systematic review of self-report instruments to identify anxiety in pregnancy. *J Adv Nurs*. 2015;71(9):1986-2001.
32. Gunning MD, Denison FC, Stockley CJ, et al. Assessing maternal anxiety in pregnancy with the State-Trait Anxiety Inventory (STAI): Issues of validity, location and participation. *J Reprod Infant Psychol*. 2010;28(3):266-73.
33. Grant N, Raouf S. A prospective population-based study to investigate the effectiveness of interventions to prevent preterm birth. *BJOG*. 2016;123:96.
34. Murray D, Cox JL. Screening for depression during pregnancy with the Edinburgh Depression Scale (EPDS). *J Reprod Infant Psychol*. 1990;8(2):99-107.
35. Bunevicius A, Kusminskas L, Pop VJ, et al. Screening for antenatal depression with the Edinburgh Depression Scale. *J Psychosom Obstet Gynecol*. 2009;30(4):238-43.
36. Gibson J, McKenzie-McHarg K, Shakespeare J, et al. A systematic review of studies validating the Edinburgh Postnatal Depression Scale in antepartum and postpartum women. *Acta Psychiatr Scand*. 2009;119(5):350-64.
37. Adewuya AO, Ola BA, Dada AO, et al. Validation of the Edinburgh Postnatal Depression Scale as a screening tool for depression in late pregnancy among Nigerian women. *J Psychosom Obstet Gynecol*. 2006;27(4):267-72.
38. Felice E, Saliba J, Grech V, et al. Validation of the Maltese version of the Edinburgh Postnatal Depression Scale. *Arch Womens Ment Health*. 2006;9(2):75-80.
39. Grant K, McMahon C, Austin M-P. Maternal anxiety during the transition to parenthood: A prospective study. *J Affect Disord*. 2008;108(1):101-11.
40. National Institute of Health and Clinical Excellence. Antenatal and Postnatal Mental Health: Clinical Management and Service Guidance 2014. Available from: <https://www.nice.org.uk/guidance/cg192>.
41. Care A, Ingleby L, Alfirovic Z, et al. The influence of the introduction of national guidelines on preterm birth prevention practice: UK experience. *BJOG*. 2019;126(6):763-9.

- 1  
2  
3 42. Dawes L, Groom K, Jordan V, et al. The use of specialised preterm birth clinics for  
4 women at high risk of spontaneous preterm birth: a systematic review. *BMC Pregnancy*  
5 *Childbirth*. 2020;20(1):58.  
6  
7  
8  
9  
10  
11  
12  
13  
14  
15  
16  
17  
18  
19  
20  
21  
22  
23  
24  
25  
26  
27  
28  
29  
30  
31  
32  
33  
34  
35  
36  
37  
38  
39  
40  
41  
42  
43  
44  
45  
46  
47  
48  
49  
50  
51  
52  
53  
54  
55  
56  
57  
58  
59  
60

For peer review only

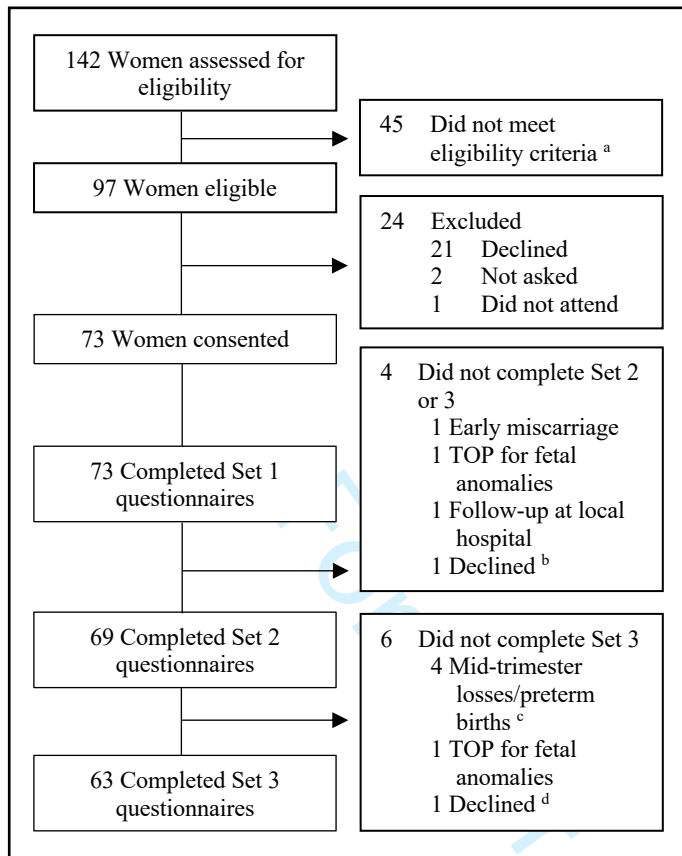

## Supplementary Information

Supplementary Table 1. Standard practice in the preterm birth clinic

|                                                |                                                                                                                                                                                                                                                                                                                                                                                                                                                                                                                                                                                                                                                                                                                                                                                                                                                                                                                                                                                      |
|------------------------------------------------|--------------------------------------------------------------------------------------------------------------------------------------------------------------------------------------------------------------------------------------------------------------------------------------------------------------------------------------------------------------------------------------------------------------------------------------------------------------------------------------------------------------------------------------------------------------------------------------------------------------------------------------------------------------------------------------------------------------------------------------------------------------------------------------------------------------------------------------------------------------------------------------------------------------------------------------------------------------------------------------|
| <b>Clinic referral criteria</b>                | <p>At least one of the following risk factors for spontaneous preterm birth:</p> <ul style="list-style-type: none"> <li>▪ Previous spontaneous preterm birth or PPROM &lt;36 weeks of gestation</li> <li>▪ Previous spontaneous second trimester loss at 16<sup>+0</sup> to 24<sup>+0</sup> weeks of gestation</li> <li>▪ Previous LLETZ with &gt;10 mm depth of excision or ≥2 procedures of any depth</li> <li>▪ Previous knife cone biopsy or trachelectomy</li> <li>▪ Congenital uterine and/or cervical anomaly</li> <li>▪ Short cervix detected on transvaginal ultrasound scan in current pregnancy of &lt;25 mm at &lt;24<sup>+0</sup> weeks of gestation</li> <li>▪ Other risk factors e.g. ≥2 surgical termination of pregnancy and/or evacuation of retained products of conception procedures, complicated caesarean section at full dilatation, history of diethylstilboestrol exposure (woman or her mother), known collagen or connective tissue disorders</li> </ul> |
| <b>Initial consultation at around 12 weeks</b> | <p>Obstetric and medical review is undertaken to identify risk factors for preterm birth, along with vaginal examination, microbiological swabs, midstream urine for culture and transvaginal ultrasound assessment of the cervix.<sup>1</sup> Women are provided with information regarding their individualised risk for preterm birth and counselled on potential interventions including lifestyle and behaviour change (including support for smoking cessation), serial cervical length assessment, cervical cerclage and progesterone therapy, and an individualised plan of care is made. History-indicated (elective) cervical cerclage is generally reserved for women with multiple second trimester miscarriages or spontaneous preterm births, in line with current evidence.<sup>2</sup> Progesterone is not offered as prophylactic treatment and use is considered only in women who develop a short cervix.</p>                                                     |
| <b>Psychological support</b>                   | <p>Clinician assessment of psychological wellbeing was performed during routine clinical assessment. Referral to women's health social work or maternal mental health services was offered to women identified as needing additional psychological support.</p>                                                                                                                                                                                                                                                                                                                                                                                                                                                                                                                                                                                                                                                                                                                      |
| <b>Subsequent reviews</b>                      | <p>In the majority of cases, subsequent visits are fortnightly from 14 to 24 weeks and include a review of pregnancy progress and transvaginal ultrasound assessment of the cervix. Ultrasound-indicated cervical cerclage or vaginal progesterone are recommended if the cervix shortens to &lt;25 mm. Decisions regarding these interventions are made on an individual basis including further review of risk factors, other signs and symptoms and cervical length.</p>                                                                                                                                                                                                                                                                                                                                                                                                                                                                                                          |
| <b>On-going care</b>                           | <p>Women are discharged back to their lead maternity carer at 23 to 25 weeks. An overall risk assessment for very early preterm birth is</p>                                                                                                                                                                                                                                                                                                                                                                                                                                                                                                                                                                                                                                                                                                                                                                                                                                         |

|  |                                                                                                                                                                                                                                                                                                                                                                                        |
|--|----------------------------------------------------------------------------------------------------------------------------------------------------------------------------------------------------------------------------------------------------------------------------------------------------------------------------------------------------------------------------------------|
|  | made at the final visit and includes the selective use of quantitative fetal fibronectin and the QUiPP App for those thought at highest risk. The QUiPP App <sup>3</sup> combines history, cervical length and fetal fibronectin to predict spontaneous preterm birth within certain timeframes and is used to guide decisions on hospital admission and antenatal corticosteroid use. |
|--|----------------------------------------------------------------------------------------------------------------------------------------------------------------------------------------------------------------------------------------------------------------------------------------------------------------------------------------------------------------------------------------|

LLETZ, large loop excision of the transformation zone; PPROM, preterm pre-labour rupture of membranes.

For peer review only

1  
2  
3  
4  
5  
6  
7  
8  
9  
10  
11  
12  
13  
14  
15  
16  
17  
18  
19  
20  
21  
22  
23  
24  
25  
26  
27  
28  
29  
30  
31  
32  
33  
34  
35  
36  
37  
38  
39  
40  
41  
42  
43  
44  
45  
46  
47  
48  
49  
50  
51  
52  
53  
54  
55  
56  
57  
58  
59  
60

### Supplementary Table 2. Study specific questionnaires from Set 1

| <b>Study specific questionnaire Set 1</b> |                                                                                                                                                                                                                                                                                                                                                                                                                                                                                              |
|-------------------------------------------|----------------------------------------------------------------------------------------------------------------------------------------------------------------------------------------------------------------------------------------------------------------------------------------------------------------------------------------------------------------------------------------------------------------------------------------------------------------------------------------------|
| 1.                                        | Which ethnic group do you belong to? Mark the space or spaces which apply to you.<br><input type="checkbox"/> New Zealand European<br><input type="checkbox"/> Māori<br><input type="checkbox"/> Samoan<br><input type="checkbox"/> Cook Island Māori<br><input type="checkbox"/> Tongan<br><input type="checkbox"/> Niuean<br><input type="checkbox"/> Chinese<br><input type="checkbox"/> Indian<br><input type="checkbox"/> Other such as Dutch, Japanese, Tokelauan. Please state: _____ |
| 2.                                        | Were you aware that you had an increased risk of your baby being born early in this pregnancy before you got pregnant?<br><input type="checkbox"/> Yes      If yes, please go to question 3<br><input type="checkbox"/> No      If no, please go to question 4                                                                                                                                                                                                                               |
| 3.                                        | Did you contemplate not getting pregnant prior to this pregnancy because you were worried about your increased chance of having a baby born early?<br><input type="checkbox"/> Yes<br><input type="checkbox"/> No                                                                                                                                                                                                                                                                            |
| 4.                                        | Once you were pregnant, did your lead maternity carer (midwife, GP or obstetrician) identify that there was an increased chance of your baby being born early in this pregnancy?<br><input type="checkbox"/> Yes      If yes, please go to question 5<br><input type="checkbox"/> No      If no, please go to question 6                                                                                                                                                                     |
| 5.                                        | How did you feel when your lead maternity carer (midwife, GP or obstetrician) identified that there was an increased chance of your baby being born early in this pregnancy?<br><input type="checkbox"/> Very anxious<br><input type="checkbox"/> Somewhat anxious<br><input type="checkbox"/> No different / the same<br><input type="checkbox"/> Somewhat reassured<br><input type="checkbox"/> Very reassured                                                                             |
| 6.                                        | How did you feel after your maternity care provider (midwife, GP or obstetrician) suggested you come to the Preterm Birth Clinic?<br><input type="checkbox"/> Significantly more anxious<br><input type="checkbox"/> Somewhat more anxious<br><input type="checkbox"/> No different / the same<br><input type="checkbox"/> Somewhat more reassured<br><input type="checkbox"/> Significantly more reassured                                                                                  |
| 7.                                        | How did you feel after you read the pamphlet about what to expect in the Preterm Birth Clinic that was included with your appointment details?<br><input type="checkbox"/> Significantly more anxious<br><input type="checkbox"/> Somewhat more anxious<br><input type="checkbox"/> No different / the same<br><input type="checkbox"/> Somewhat more reassured                                                                                                                              |



|    |                                                                                                           |
|----|-----------------------------------------------------------------------------------------------------------|
| 1  | <input type="checkbox"/> Significantly more reassured                                                     |
| 2  |                                                                                                           |
| 3  |                                                                                                           |
| 4  | 8. Do you have a partner?                                                                                 |
| 5  | <input type="checkbox"/> Yes                                                                              |
| 6  | <input type="checkbox"/> No                                                                               |
| 7  |                                                                                                           |
| 8  | 9. How would you describe your social support network (for example your partner,                          |
| 9  | whānau/family, friends)?                                                                                  |
| 10 | <input type="checkbox"/> Very unsupportive                                                                |
| 11 | <input type="checkbox"/> Somewhat unsupportive                                                            |
| 12 | <input type="checkbox"/> Neither supportive nor unsupportive                                              |
| 13 | <input type="checkbox"/> Somewhat supportive                                                              |
| 14 | <input type="checkbox"/> Very supportive                                                                  |
| 15 |                                                                                                           |
| 16 | 10. Note how anxious (on average) you have felt about your pregnancy over the past 7                      |
| 17 | days with a mark ( ) on the line below.                                                                   |
| 18 |                                                                                                           |
| 19 |                                                                                                           |
| 20 |                                                                                                           |
| 21 | 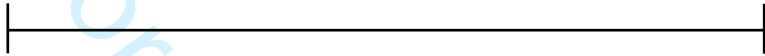                        |
| 22 | Not at all                                                                                                |
| 23 | anxious                                                                                                   |
| 24 | Extremely                                                                                                 |
| 25 | anxious                                                                                                   |
| 26 | 11. What are you most anxious about in this pregnancy? ( <i>space for response</i> )                      |
| 27 | 12. What do you find most helpful to relieve any pregnancy-related anxiety? ( <i>space for response</i> ) |
| 28 | 13. Have you ever been diagnosed with any of the following mental health conditions?                      |
| 29 | <input type="checkbox"/> Depression                                                                       |
| 30 | <input type="checkbox"/> Postnatal depression                                                             |
| 31 | <input type="checkbox"/> Generalised anxiety disorder                                                     |
| 32 | <input type="checkbox"/> Post-traumatic stress disorder                                                   |
| 33 | <input type="checkbox"/> Social anxiety disorder                                                          |
| 34 | <input type="checkbox"/> Panic disorder                                                                   |
| 35 | <input type="checkbox"/> Obsessive-compulsive disorder                                                    |
| 36 | <input type="checkbox"/> Bipolar disorder                                                                 |
| 37 | <input type="checkbox"/> Schizophrenia                                                                    |
| 38 | <input type="checkbox"/> Borderline personality disorder                                                  |
| 39 | <input type="checkbox"/> Other, please name _____                                                         |
| 40 | <input type="checkbox"/> None                                                                             |
| 41 |                                                                                                           |
| 42 | 14. Are you currently taking any prescribed medication for a mental health condition?                     |
| 43 | <input type="checkbox"/> Yes. If so, what is the name of this medication? _____                           |
| 44 | <input type="checkbox"/> No                                                                               |
| 45 |                                                                                                           |
| 46 | 15. Have you ever taken any prescribed medication for a mental health condition?                          |
| 47 | <input type="checkbox"/> Yes. If so, what is the name of this medication? _____                           |
| 48 | <input type="checkbox"/> No                                                                               |
| 49 |                                                                                                           |
| 50 | 16. Are you currently under the care of a psychiatrist or psychologist?                                   |
| 51 | <input type="checkbox"/> Yes. If so, what is this for? _____                                              |
| 52 | <input type="checkbox"/> No                                                                               |
| 53 |                                                                                                           |
| 54 | 17. Have you ever been seen by a psychiatrist?                                                            |
| 55 | <input type="checkbox"/> Yes. If so, when was this and what was it for? _____                             |
| 56 | <input type="checkbox"/> No                                                                               |
| 57 |                                                                                                           |
| 58 | 18. Are you taking any pregnancy supplements or probiotics, other than folic acid, Elevit                 |
| 59 | or iodine?                                                                                                |
| 60 |                                                                                                           |

- 1  
2  
3  
4  
5  
6  
7  
8  
9  
10  
11  
12  
13  
14  
15  
16  
17  
18  
19  
20  
21  
22  
23  
24  
25  
26  
27  
28  
29  
30  
31  
32  
33  
34  
35  
36  
37  
38  
39  
40  
41  
42  
43  
44  
45  
46  
47  
48  
49  
50  
51  
52  
53  
54  
55  
56  
57  
58  
59  
60
- |                                                                                  |
|----------------------------------------------------------------------------------|
| <input type="checkbox"/> Yes. If so, what is the name of the supplement/s? _____ |
| <input type="checkbox"/> No                                                      |

For peer review only

1  
2  
3  
4  
5  
6  
7  
8  
9  
10  
11  
12  
13  
14  
15  
16  
17  
18  
19  
20  
21  
22  
23  
24  
25  
26  
27  
28  
29  
30  
31  
32  
33  
34  
35  
36  
37  
38  
39  
40  
41  
42  
43  
44  
45  
46  
47  
48  
49  
50  
51  
52  
53  
54  
55  
56  
57  
58  
59  
60

### Supplementary Table 3. Study specific questionnaires from Set 3

| Study specific questionnaire Set 3 |                                                                                                                                                                                                                                                                                                                                                                                       |
|------------------------------------|---------------------------------------------------------------------------------------------------------------------------------------------------------------------------------------------------------------------------------------------------------------------------------------------------------------------------------------------------------------------------------------|
| 1.                                 | How have you found the quality of your general pregnancy care?<br><input type="checkbox"/> Very low quality<br><input type="checkbox"/> Low quality<br><input type="checkbox"/> Neither high or low quality<br><input type="checkbox"/> High quality<br><input type="checkbox"/> Very high quality                                                                                    |
| 2.                                 | How have you found the quality of your care through the Preterm Birth Clinic?<br><input type="checkbox"/> Very low quality<br><input type="checkbox"/> Low quality<br><input type="checkbox"/> Neither high or low quality<br><input type="checkbox"/> High quality<br><input type="checkbox"/> Very high quality                                                                     |
| 3.                                 | Do you think that being seen in a preterm birth clinic made you more or less anxious about your pregnancy?<br><input type="checkbox"/> Significantly more anxious<br><input type="checkbox"/> Somewhat more anxious<br><input type="checkbox"/> Neither more or less anxious<br><input type="checkbox"/> Somewhat less anxious<br><input type="checkbox"/> Significantly less anxious |
| 4.                                 | If you have another pregnancy, would you want to be cared for through a preterm birth clinic again?<br><input type="checkbox"/> Yes<br><input type="checkbox"/> No<br><input type="checkbox"/> Unsure                                                                                                                                                                                 |
| 5.                                 | Note how anxious (on average) you have felt about your pregnancy over the past 7 days with a mark ( ) on the line below.<br><p style="text-align: center;"> <span style="margin-right: 100px;">Not at all<br/>anxious</span> <span style="margin-left: 100px;">Extremely<br/>anxious</span> </p>                                                                                      |
| 6.                                 | What are you most anxious about in this pregnancy? <i>(space for response)</i>                                                                                                                                                                                                                                                                                                        |
| 7.                                 | What do you find most helpful to relieve any pregnancy-related anxiety? <i>(space for response)</i>                                                                                                                                                                                                                                                                                   |
| 8.                                 | Have you been diagnosed with a mental health condition since you were first seen in the Preterm Birth Clinic this pregnancy?<br><input type="checkbox"/> Yes, if so please provide details _____<br><input type="checkbox"/> No                                                                                                                                                       |

**Supplementary Table 4. Criteria for risk classification for study purposes at discharge from the preterm birth clinic**

| <b>Risk classification</b> | <b>Criteria</b>                                                                                                                                                                                                                                      |
|----------------------------|------------------------------------------------------------------------------------------------------------------------------------------------------------------------------------------------------------------------------------------------------|
| Low                        | Cervical length >25 mm, AND<br>Quantitative fetal fibronectin level of <50 ng/ml if performed (based on usual clinical indications), AND<br>No intervention (progesterone or cerclage) required during the current pregnancy due to cervical change  |
| Intermediate               | Shortened cervical length to 11-25 mm, AND/OR<br>Quantitative fetal fibronectin level of 50-199 ng/ml if performed (based on usual indications), AND/OR<br>Need for progesterone and/or cerclage during the current pregnancy due to cervical change |
| High                       | Shortened cervical length to <10 mm, AND/OR<br>Quantitative fetal fibronectin level of $\geq$ 200 ng/ml if performed (based on usual indications)                                                                                                    |

**Supplementary Table 5. Women's knowledge of their preterm birth risk and their perceptions of preterm birth clinic care**

| Question and response                                                                                                                                                      | Number (%)   |
|----------------------------------------------------------------------------------------------------------------------------------------------------------------------------|--------------|
| <b>Set 1 (baseline)</b>                                                                                                                                                    |              |
| 1. Were you aware that you had an increased risk of your baby being born early before you got pregnant?                                                                    |              |
| Yes                                                                                                                                                                        | 59/73 (80.8) |
| No                                                                                                                                                                         | 14/73 (19.2) |
| 2. Did you contemplate not getting pregnant because you were worried about your increased chance of having a baby born early? <sup>a</sup>                                 |              |
| Yes                                                                                                                                                                        | 19/59 (32.2) |
| No                                                                                                                                                                         | 40/59 (67.8) |
| 3. Once you were pregnant, did your lead maternity carer (midwife, GP or obstetrician) identify that there was an increased chance of your baby being born early?          |              |
| Yes                                                                                                                                                                        | 51/71 (71.8) |
| No                                                                                                                                                                         | 20/71 (28.2) |
| 4. How did you feel when your lead maternity carer (midwife, GP or obstetrician) identified that there was an increased chance of your baby being born early? <sup>b</sup> |              |
| Very anxious                                                                                                                                                               | 11/51 (21.6) |
| Somewhat anxious                                                                                                                                                           | 20/51 (39.2) |
| Neither anxious nor relieved                                                                                                                                               | 12/51 (23.5) |
| Somewhat relieved                                                                                                                                                          | 5/51 (9.8)   |
| Very relieved                                                                                                                                                              | 3/51 (5.9)   |
| 5. How did you feel after your maternity care provider (midwife, GP or obstetrician) suggested you come to the Preterm Birth Clinic?                                       |              |
| Significantly more anxious                                                                                                                                                 | 8/71 (11.3)  |
| Somewhat more anxious                                                                                                                                                      | 12/71 (16.9) |
| Neither more or less anxious                                                                                                                                               | 11/71 (15.5) |
| Somewhat less anxious                                                                                                                                                      | 24/71 (33.8) |
| Significantly less anxious                                                                                                                                                 | 16/71 (22.5) |
| 6. How did you feel after you read the pamphlet about what to expect in the Preterm Birth Clinic that was included with your appointment details?                          |              |
| Significantly more anxious                                                                                                                                                 | 1/69 (1.4)   |
| Somewhat more anxious                                                                                                                                                      | 13/69 (18.8) |
| Neither more or less anxious                                                                                                                                               | 30/69 (43.5) |
| Somewhat less anxious                                                                                                                                                      | 20/69 (29.0) |
| Significantly less anxious                                                                                                                                                 | 5/69 (7.2)   |
| 8. How would you describe your social support network (for example your partner, whānau/family, friends)?                                                                  |              |
| Very unsupportive                                                                                                                                                          | 7/72 (9.7)   |
| Somewhat unsupportive                                                                                                                                                      | 1/72 (1.4)   |
| Neither supportive nor unsupportive                                                                                                                                        | 2/72 (2.8)   |
| Somewhat supportive                                                                                                                                                        | 6/72 (8.3)   |
| Very supportive                                                                                                                                                            | 56/72 (77.8) |
| <b>Set 3 (after last visit)</b>                                                                                                                                            |              |

|                                                                                                               |              |
|---------------------------------------------------------------------------------------------------------------|--------------|
| 1. How have you found the quality of your general pregnancy care?                                             |              |
| Very low quality                                                                                              | 0/63 (0.0)   |
| Low quality                                                                                                   | 1/63 (1.6)   |
| Neither high or low quality                                                                                   | 4/63 (6.3)   |
| High quality                                                                                                  | 13/63 (20.6) |
| Very high quality                                                                                             | 45/63 (71.4) |
| 2. How have you found the quality of your care through the Preterm Birth Clinic?                              |              |
| Very low quality                                                                                              | 0/63 (0.0)   |
| Low quality                                                                                                   | 1/63 (1.6)   |
| Neither high or low quality                                                                                   | 1/63 (1.6)   |
| High quality                                                                                                  | 12/63 (19.0) |
| Very high quality                                                                                             | 49/63 (77.8) |
| 3. Do you think that being seen in a preterm birth clinic made you more or less anxious about your pregnancy? |              |
| Significantly more anxious                                                                                    | 2/63 (3.2)   |
| Somewhat more anxious                                                                                         | 2/63 (3.2)   |
| Neither more or less anxious                                                                                  | 3/63 (4.8)   |
| Somewhat less anxious                                                                                         | 14/63 (22.2) |
| Significantly less anxious                                                                                    | 42/63 (66.7) |
| 4. If you have another pregnancy, would you want to be cared for through a preterm birth clinic again?        |              |
| Yes                                                                                                           | 55/63 (87.3) |
| No                                                                                                            | 7/63 (11.1)  |
| Unsure                                                                                                        | 1/63 (1.6)   |

GP, general practitioner.

Denominator reflects numbered of respondents that answered each individual question.

<sup>a</sup> Only answered if responded 'Yes' to question 1.

<sup>b</sup> Only answered if responded 'Yes' to question 3.

1  
2  
3  
4  
5  
6  
7  
8  
9  
10  
11  
12  
13  
14  
15  
16  
17  
18  
19  
20  
21  
22  
23  
24  
25  
26  
27  
28  
29  
30  
31  
32  
33  
34  
35  
36  
37  
38  
39  
40  
41  
42  
43  
44  
45  
46  
47  
48  
49  
50  
51  
52  
53  
54  
55  
56  
57  
58  
59  
60

For peer review only

## References for Supplementary Material

1. Auckland District Health Board. Referral to the National Women's Health Preterm Birth Clinic Auckland: Auckland District Health Board; 2019. Available from: <http://nationalwomenshealth.adhb.govt.nz/assets/Uploads/PTB-Clinic-Referral-Guidelines-ACH-May2019.pdf>
2. Vernet G, Watson H, Ridout A, Shennan A. The Role of PTB Clinics: A Review of the Screening Methods, Interventions and Evidence for Preterm Birth Surveillance Clinics for High-Risk Asymptomatic Women. *Women Health Bull.* 2017;4(4):e12667.
3. Kuhrt K, Smout E, Hezelgrave N, Seed PT, Carter J, Shennan AH. Development and validation of a tool incorporating cervical length and quantitative fetal fibronectin to predict spontaneous preterm birth in asymptomatic high-risk women. *Ultrasound in Obstetrics & Gynecology.* 2016;47(1):104-9.



## STROBE Statement—checklist of items that should be included in reports of observational studies

|                              | Item No | Recommendation                                                                                                                                                                       | Page No |
|------------------------------|---------|--------------------------------------------------------------------------------------------------------------------------------------------------------------------------------------|---------|
| <b>Title and abstract</b>    | 1       | (a) Indicate the study's design with a commonly used term in the title or the abstract                                                                                               | 1       |
|                              |         | (b) Provide in the abstract an informative and balanced summary of what was done and what was found                                                                                  | 2       |
| <b>Introduction</b>          |         |                                                                                                                                                                                      |         |
| Background/rationale         | 2       | Explain the scientific background and rationale for the investigation being reported                                                                                                 | 5       |
| Objectives                   | 3       | State specific objectives, including any prespecified hypotheses                                                                                                                     | 5       |
| <b>Methods</b>               |         |                                                                                                                                                                                      |         |
| Study design                 | 4       | Present key elements of study design early in the paper                                                                                                                              | 6-7     |
| Setting                      | 5       | Describe the setting, locations, and relevant dates, including periods of recruitment, exposure, follow-up, and data collection                                                      | 6-7     |
| Participants                 | 6       | (a) <i>Cohort study</i> —Give the eligibility criteria, and the sources and methods of selection of participants. Describe methods of follow-up                                      | 6-7     |
|                              |         | (b) <i>Cohort study</i> —For matched studies, give matching criteria and number of exposed and unexposed                                                                             | N/A     |
| Variables                    | 7       | Clearly define all outcomes, exposures, predictors, potential confounders, and effect modifiers. Give diagnostic criteria, if applicable                                             | 5,8     |
| Data sources/<br>measurement | 8*      | For each variable of interest, give sources of data and details of methods of assessment (measurement). Describe comparability of assessment methods if there is more than one group | 6-7     |
| Bias                         | 9       | Describe any efforts to address potential sources of bias                                                                                                                            | 8       |
| Study size                   | 10      | Explain how the study size was arrived at                                                                                                                                            | 7-8     |
| Quantitative variables       | 11      | Explain how quantitative variables were handled in the analyses. If applicable, describe which groupings were chosen and why                                                         | 8       |
| Statistical methods          | 12      | (a) Describe all statistical methods, including those used to control for confounding                                                                                                | 8       |
|                              |         | (b) Describe any methods used to examine subgroups and interactions                                                                                                                  | N/A     |
|                              |         | (c) Explain how missing data were addressed                                                                                                                                          | 19      |
|                              |         | (d) <i>Cohort study</i> —If applicable, explain how loss to follow-up was addressed                                                                                                  | 19      |
|                              |         | (e) Describe any sensitivity analyses                                                                                                                                                | N/A     |

Continued on next page

| <b>Results</b>           |     |                                                                                                                                                                                                              |       |
|--------------------------|-----|--------------------------------------------------------------------------------------------------------------------------------------------------------------------------------------------------------------|-------|
| Participants             | 13* | (a) Report numbers of individuals at each stage of study—eg numbers potentially eligible, examined for eligibility, confirmed eligible, included in the study, completing follow-up, and analysed            | Fig 1 |
|                          |     | (b) Give reasons for non-participation at each stage                                                                                                                                                         | Fig 1 |
|                          |     | (c) Consider use of a flow diagram                                                                                                                                                                           | Fig 1 |
| Descriptive data         | 14* | (a) Give characteristics of study participants (eg demographic, clinical, social) and information on exposures and potential confounders                                                                     | 9-10  |
|                          |     | (b) Indicate number of participants with missing data for each variable of interest                                                                                                                          | 9-10  |
|                          |     | (c) <i>Cohort study</i> —Summarise follow-up time (eg, average and total amount)                                                                                                                             | 10    |
| Outcome data             | 15* | <i>Cohort study</i> —Report numbers of outcome events or summary measures over time                                                                                                                          | 11-12 |
| Main results             | 16  | (a) Give unadjusted estimates and, if applicable, confounder-adjusted estimates and their precision (eg, 95% confidence interval). Make clear which confounders were adjusted for and why they were included | 11-12 |
|                          |     | (b) Report category boundaries when continuous variables were categorized                                                                                                                                    | 11    |
|                          |     | (c) If relevant, consider translating estimates of relative risk into absolute risk for a meaningful time period                                                                                             | N/A   |
| Other analyses           | 17  | Report other analyses done—eg analyses of subgroups and interactions, and sensitivity analyses                                                                                                               | N/A   |
| <b>Discussion</b>        |     |                                                                                                                                                                                                              |       |
| Key results              | 18  | Summarise key results with reference to study objectives                                                                                                                                                     | 16-17 |
| Limitations              | 19  | Discuss limitations of the study, taking into account sources of potential bias or imprecision. Discuss both direction and magnitude of any potential bias                                                   | 18-19 |
| Interpretation           | 20  | Give a cautious overall interpretation of results considering objectives, limitations, multiplicity of analyses, results from similar studies, and other relevant evidence                                   | 18-19 |
| Generalisability         | 21  | Discuss the generalisability (external validity) of the study results                                                                                                                                        | 19    |
| <b>Other information</b> |     |                                                                                                                                                                                                              |       |
| Funding                  | 22  | Give the source of funding and the role of the funders for the present study and, if applicable, for the original study on which the present article is based                                                | 20    |

# BMJ Open

## The psychological wellbeing of women at high risk of spontaneous preterm birth cared for in a specialised preterm birth clinic: a prospective longitudinal cohort study

|                                 |                                                                                                                                                                                                                                                                                                                                 |
|---------------------------------|---------------------------------------------------------------------------------------------------------------------------------------------------------------------------------------------------------------------------------------------------------------------------------------------------------------------------------|
| Journal:                        | <i>BMJ Open</i>                                                                                                                                                                                                                                                                                                                 |
| Manuscript ID                   | bmjopen-2021-056999.R1                                                                                                                                                                                                                                                                                                          |
| Article Type:                   | Original research                                                                                                                                                                                                                                                                                                               |
| Date Submitted by the Author:   | 13-Dec-2021                                                                                                                                                                                                                                                                                                                     |
| Complete List of Authors:       | Dawes, Lisa; The University of Auckland; Auckland City Hospital<br>Waugh, Jason J.S.; Auckland City Hospital; The University of Auckland, Department of Obstetrics and Gynaecology<br>Lee, Arier; University of Auckland, Section of Epidemiology and Biostatistics<br>Groom, KM; The University of Auckland, Liggins Institute |
| <b>Primary Subject Heading</b>: | Obstetrics and gynaecology                                                                                                                                                                                                                                                                                                      |
| Secondary Subject Heading:      | Patient-centred medicine                                                                                                                                                                                                                                                                                                        |
| Keywords:                       | Maternal medicine < OBSTETRICS, Fetal medicine < OBSTETRICS, Depression & mood disorders < PSYCHIATRY                                                                                                                                                                                                                           |
|                                 |                                                                                                                                                                                                                                                                                                                                 |

SCHOLARONE™  
Manuscripts



I, the Submitting Author has the right to grant and does grant on behalf of all authors of the Work (as defined in the below author licence), an exclusive licence and/or a non-exclusive licence for contributions from authors who are: i) UK Crown employees; ii) where BMJ has agreed a CC-BY licence shall apply, and/or iii) in accordance with the terms applicable for US Federal Government officers or employees acting as part of their official duties; on a worldwide, perpetual, irrevocable, royalty-free basis to BMJ Publishing Group Ltd ("BMJ") its licensees and where the relevant Journal is co-owned by BMJ to the co-owners of the Journal, to publish the Work in this journal and any other BMJ products and to exploit all rights, as set out in our [licence](#).

The Submitting Author accepts and understands that any supply made under these terms is made by BMJ to the Submitting Author unless you are acting as an employee on behalf of your employer or a postgraduate student of an affiliated institution which is paying any applicable article publishing charge ("APC") for Open Access articles. Where the Submitting Author wishes to make the Work available on an Open Access basis (and intends to pay the relevant APC), the terms of reuse of such Open Access shall be governed by a Creative Commons licence – details of these licences and which [Creative Commons](#) licence will apply to this Work are set out in our licence referred to above.

Other than as permitted in any relevant BMJ Author's Self Archiving Policies, I confirm this Work has not been accepted for publication elsewhere, is not being considered for publication elsewhere and does not duplicate material already published. I confirm all authors consent to publication of this Work and authorise the granting of this licence.

## TITLE PAGE

### Full title

The psychological wellbeing of women at high risk of spontaneous preterm birth cared for in a specialised preterm birth clinic: a prospective longitudinal cohort study

### Authors

Lisa K. Dawes (MChB, MD)<sup>1,2</sup>

Jason J.S. Waugh (MBBS)<sup>2,3</sup>

Arier C. Lee (PhD)<sup>4</sup>

Katie M. Groom (MBBS, PhD)<sup>1,2</sup>

### Affiliations

<sup>1</sup> Liggins Institute, The University of Auckland, Auckland, New Zealand

<sup>2</sup> National Women's Health, Auckland City Hospital, Auckland, New Zealand

<sup>3</sup> Department of Obstetrics and Gynaecology, The University of Auckland, Auckland, New Zealand

<sup>4</sup> Section of Epidemiology and Biostatistics, The University of Auckland, Auckland, New Zealand

### Contact information for corresponding author

Lisa K. Dawes

Address: Liggins Institute, The University of Auckland, Private Bag 92019, Auckland 1142, New Zealand

Phone: +64 21 158 2076

Email: l.dawes@auckland.ac.nz

### Manuscript word count

3384 words

### Keywords

Spontaneous preterm birth; preterm birth clinics; anxiety; depression, prenatal care.

## ABSTRACT

**Objectives:** To assess the psychological wellbeing of pregnant women at increased risk of spontaneous preterm birth, and the impact of care from a preterm birth clinic.

**Design:** Single-centre longitudinal cohort study over one year, 2018-2019.

**Setting:** Tertiary maternity hospital in Auckland, New Zealand.

**Participants:** Pregnant women at increased risk of spontaneous preterm birth receiving care in a preterm birth clinic.

**Intervention:** Participants completed three sets of questionnaires (State-Trait Anxiety Inventory, Edinburgh Postnatal Depression Scale, 36-Item Short Form Survey) – prior to their first, after their second, and after their last clinic appointments. Study-specific questionnaires explored pregnancy-related anxiety and perceptions of care.

**Primary and secondary outcome measures:** The primary outcome was the mean state-anxiety score. Secondary outcomes included depression and quality of life measures.

**Results:** 73/97 (75.3%) eligible women participated; 41.1% had a previous preterm birth, 31.5% a second trimester loss and 28.8% cervical surgery; 20.6% had a prior mental health condition. 63/73 (86.3%) women completed all questionnaires. The adjusted mean state-anxiety score was 39.0 at baseline, which decreased to 36.5 after the second visit (difference -2.5, 95% CI -5.5 to 0.5,  $P=0.1$ ) and to 32.6 after the last visit (difference -3.9 from second visit, 95% CI -6.4 to -1.5,  $P=0.002$ ). Rates of anxiety (state-anxiety score >40) and depression (Edinburgh Postnatal Depression Scale score >12) were 38.4%, 34.8%, 19.0%, and 13.7%, 8.7%, 9.5% respectively, at the same time periods. Perceptions of care were favourable; 88.9% stated the preterm birth clinic made them significantly or somewhat less anxious and 87.3% wanted to be seen again in a future pregnancy.

**Conclusions:** Women at increased risk of spontaneous preterm birth have high levels of anxiety. Psychological wellbeing improved during the second trimester; women perceived that

1  
2  
3 preterm birth clinic care reduced pregnancy-related anxiety. These findings support the ongoing  
4 use and development of preterm birth clinics.  
5  
6  
7  
8  
9  
10  
11  
12  
13  
14  
15  
16  
17  
18  
19  
20  
21  
22  
23  
24  
25  
26  
27  
28  
29  
30  
31  
32  
33  
34  
35  
36  
37  
38  
39  
40  
41  
42  
43  
44  
45  
46  
47  
48  
49  
50  
51  
52  
53  
54  
55  
56  
57  
58  
59  
60

For peer review only

### Strengths and limitations of this study

- This is the first study to assess the psychological wellbeing of women at high risk of spontaneous preterm birth who are cared for in a specialised preterm birth clinic.
- Strengths of the study include the prospective study design, and high rates of recruitment and participant retention in an ethnically diverse group of women.
- Limitations of the study are the modest sample size, lack of a comparison group and the use of screening tools rather than diagnostic criteria for anxiety and depression,.
- Although this study demonstrates improved psychological wellbeing of women at high risk of spontaneous preterm birth, further research is required to more directly quantify the impact of a preterm birth clinic on this.



## Main Text

### INTRODUCTION

Psychological disorders are common in pregnancy.<sup>1,2</sup> Women with high risk pregnancies are more likely to suffer psychological distress with higher rates of anxiety and depression than the general pregnant population.<sup>3-5</sup> Few studies have assessed the psychological wellbeing of women who are at high risk of spontaneous preterm birth, and in particular, the potential impact of care from a specialised preterm birth clinic. Preterm birth clinics provide a package of care to asymptomatic women identified to be at increased risk based on their obstetric and gynaecological history. This care includes regular visits through the second trimester for ultrasound surveillance of cervical length and provision of treatments to prevent preterm birth such as cervical cerclage and vaginal progesterone therapy when indicated.<sup>6,7,8</sup> Close monitoring and reassurance provided through a preterm birth clinic may reduce pregnancy-related anxiety, however, it is also possible that being labelled ‘high risk’ may increase psychological distress and anxiety.<sup>9-11</sup> Further research in this area has been recommended.<sup>12</sup>

There is increasing recognition of the importance of psychological wellbeing in pregnancy. Meta-analyses show that antenatal depression is associated with a modestly increased risk of preterm birth and fetal growth restriction, and decreased rates of breastfeeding initiation.<sup>13,14</sup> The effect of anxiety is less well evaluated, but is associated with increased pregnancy-related hypertension and caesarean section, decreased rates of exclusive breastfeeding and increased anxiety in the offspring.<sup>15</sup> Antenatal anxiety and depression are also strong predictors of postnatal depression.<sup>16</sup> Strategies for prevention, along with improvements in the recognition and treatment of psychological disorders in pregnancy, are likely to improve outcomes for women and children.<sup>17</sup>

This study aims to assess rates of anxiety, depression and health-related quality of life in pregnant women at high risk of spontaneous preterm birth who are cared for in a preterm birth clinic. The primary hypothesis is that women will have less anxiety after their second consultation in a preterm birth clinic compared to before their first (baseline), and this improvement will be sustained at the end of the second trimester. Secondary hypotheses are that women will have fewer symptoms of depression, improved quality of life, and less pregnancy-related anxiety over the same period.

## MATERIAL AND METHODS

This longitudinal cohort study was carried out in a large tertiary maternity hospital in Auckland, New Zealand. All eligible women attending the preterm birth clinic over a 12 month period from August 2018 to August 2019 were invited to participate prior to their first appointment. This preterm birth clinic provides care to pregnant women perceived to be at high risk of spontaneous preterm birth and accepts local and regional referrals. Eligibility criteria for the preterm birth clinic include women with a previous spontaneous preterm birth, previous second trimester loss, history of extensive cervical surgery, or congenital uterine anomaly. Care through the preterm birth clinic includes initial assessment, risk factor modification, serial surveillance of cervical length until 24 weeks, and interventions such as vaginal progesterone and cervical cerclage when indicated (Supplementary Table 1). Care in the preterm birth clinic is provided by a specialist obstetric and midwifery team on a weekly basis, and is in addition to routine antenatal care.

Inclusion criteria for the study were gestational age  $<24^{+0}$  weeks at first visit; live fetus; eligible for preterm birth clinic review due to  $\geq 1$  risk factor for spontaneous preterm birth (Supplementary Table 1); written consent obtained; and sufficient English to independently complete questionnaires. Participants completed three sets of questionnaires: prior to their first clinic appointment (baseline, Set 1), after their second appointment (usually 2-3 weeks later, Set 2), and after their last appointment (usually at 23-24 weeks of gestation, Set 3). Three women were seen for only two appointments and returned the Set 3 questionnaires by post two weeks after their last visit. Each set of questionnaires contained three validated measures: the State-Trait Anxiety Inventory (STAI), used under licence from Mind Garden Incorporated<sup>18</sup> which contains two subscales to allow differentiation between temporary 'state-anxiety' and the relatively stable and long-standing aspects of anxiety proneness in 'trait-anxiety';<sup>19</sup> the Edinburgh Postnatal Depression Scale (EPDS) which is validated for antenatal depression;<sup>20</sup> and the RAND 36-Item Short Form Survey (SF-36) to assess health-related quality of life.<sup>21,22</sup> Set 1 and 3 also included a study-specific questionnaire to assess mental health history, social support, pregnancy-related anxiety and perceptions of care. This included free text responses on pregnancy-related anxiety triggers and what helped to relieve it (Supplementary Tables 2 and 3). The study-specific questionnaires were developed by the research team and piloted for the first five women and minor changes made based on feedback.

1  
2  
3 For the purposes of this study, state-anxiety was considered the most relevant assessment for  
4 current levels of anxiety. A screen positive result was defined as a score of >40 on the STAI  
5 state-anxiety score. Pregnancy-related anxiety was also assessed using a ten-point visual  
6 analogue scale and reported separately. In the assessment of depression, a screen positive result  
7 was defined as a score of >12 on the EPDS.  
8  
9

10  
11  
12  
13 Participants were contacted by telephone prior to their first appointment and invited to  
14 participate, and participant information and consent forms were provided in advance to  
15 interested women. After consenting, participants completed hard copy questionnaires  
16 independently using a private room, just prior to their first clinic consultation. The EPDS self-  
17 harm question was reviewed at completion and for any women answering 'yes, quite often' or  
18 'sometimes', further assessment of safety was made and referral to maternal mental health  
19 services offered. No other changes were made to clinical care. All other responses were seen  
20 only by a single investigator not responsible for decisions about referral for psychological  
21 support, until completion of the study. Standard clinic practice is described in Supplementary  
22 Table 1. At the last visit, the discharging obstetrician used pre-defined criteria developed for  
23 the purposes of this study to classify ongoing preterm birth risk. Women were considered low  
24 risk if cervical length was >25 mm with fetal fibronectin <50 ng/ml (if performed), and no  
25 intervention with vaginal progesterone or cerclage required; intermediate risk if cervical length  
26 was 11-25 mm, and/or fetal fibronectin 50-199 ng/ml, and/or there was need for progesterone  
27 or cerclage; or high risk if cervical length was <10 mm, and/or fetal fibronectin  $\geq$ 200 ng/ml  
28 (Supplementary Table 4).  
29  
30  
31  
32  
33  
34  
35  
36  
37  
38  
39  
40  
41  
42

43 Demographic details, pregnancy characteristics, medical history, and pregnancy outcomes were  
44 obtained from electronic medical records. These data, along with questionnaire responses were  
45 entered into a password-protected Excel spreadsheet by a single investigator.  
46  
47  
48  
49

50 The primary outcome was the STAI state-anxiety score. Secondary outcomes were the EPDS  
51 score, SF-36 summary quality of life scores, and pregnancy-related anxiety (as continuous  
52 measures).  
53  
54  
55

### 56 *Statistical analyses*

57 A pragmatic sample size was used. We aimed to invite all eligible women over a one year period  
58 to participate. Using data from medically high risk women,<sup>23</sup> we estimated a sample size of 60  
59  
60

1  
2  
3 would provide 80% power, with alpha of 0.05, two-sided test and an estimated within subject  
4 correlation of 0.75 to detect a decrease in the mean state-anxiety score from 40.0 (SD 12.0) to  
5 36.9.  
6  
7  
8  
9

10 Descriptive statistics were calculated using SPSS (version 25.0) and R software (version  
11 3.5.3).<sup>24,25</sup> Thematic analysis was carried out on free-text responses using Braun and Clarke  
12 methodology by a single investigator.<sup>26</sup> The mixed model for repeated measures analyses  
13 (MMRM) was used to analyse repeatedly measured continuous outcomes and conducted using  
14 SAS software (version 9.4).<sup>27</sup> This analyses was used to test for time effect adjusting for prior  
15 diagnosis of a mental health condition, gestational age at first visit and obstetric history  
16 (categorised by no previous pregnancy beyond 12 weeks; loss/preterm birth at 12-28 weeks;  
17 loss/preterm birth at 28-37 weeks; or term birth only), and subject was included as a random  
18 effect. Kenward-Roger method was used to estimate the denominator degrees of freedom for  
19 fixed effects. Two-sided P-value <0.05 determined statistical significance. All confidence  
20 intervals (CI) are given at a two-sided 95% level.  
21  
22  
23  
24  
25  
26  
27  
28  
29

### 30 *Ethical approval*

31 Ethical approval was granted by the New Zealand Health and Disability Ethics Committees  
32 (18/NTA/103) and institutional approval by the Auckland District Health Board Research  
33 Review Committee (A+8127) in July 2018.  
34  
35  
36  
37  
38

### 39 *Patient and public involvement*

40 The study-specific questionnaire was piloted amongst the first five participants, who were asked  
41 for feedback on the clarity and importance of the questions. There was no other patient  
42 involvement in the study development.  
43  
44  
45  
46  
47

## 48 **RESULTS**

49  
50  
51 The recruitment rate was 75.3% (73/97), participation is described in Figure 1. Demographics,  
52 obstetric characteristics and risk factors for preterm birth are detailed in Table 1. Some women  
53 had been seen in the clinic in a previous pregnancy (17/73, 23.3%) and/or for pre-pregnancy  
54 review (12/73, 16.4%).  
55  
56  
57  
58  
59  
60

**Table 1. Demographic details, obstetric characteristics and risk factors for preterm birth**

| Characteristic                                                                                     | Number (%) or mean (SD), n=73 |
|----------------------------------------------------------------------------------------------------|-------------------------------|
| Ethnicity                                                                                          |                               |
| European                                                                                           | 36 (49.3)                     |
| Māori                                                                                              | 7 (9.6)                       |
| Pacific                                                                                            | 5 (6.8)                       |
| Asian                                                                                              | 11 (15.1)                     |
| Indian                                                                                             | 9 (12.3)                      |
| Other                                                                                              | 5 (6.8)                       |
| Age (years)                                                                                        |                               |
| Mean                                                                                               | 34.0 (5.1)                    |
| Range                                                                                              | 22-45                         |
| Body mass index (kg/m <sup>2</sup> ) <sup>a</sup>                                                  |                               |
| Mean                                                                                               | 26.3 (6.4)                    |
| Range                                                                                              | 19-57                         |
| Current smoker                                                                                     | 5 (6.8)                       |
| Has a current partner                                                                              | 72 (98.6)                     |
| Previous diagnosis of a mental health condition (non-exclusive) <sup>b</sup>                       |                               |
| Depression                                                                                         | 10 (13.7)                     |
| Postnatal depression                                                                               | 4 (5.5)                       |
| Generalised anxiety disorder                                                                       | 2 (2.7)                       |
| Panic disorder                                                                                     | 1 (1.4)                       |
| Social anxiety disorder                                                                            | 1 (1.4)                       |
| Post-traumatic spectrum disorder                                                                   | 3 (4.1)                       |
| None                                                                                               | 58 (79.4)                     |
| Currently taking medication for a mental health condition?                                         | 4 (5.5)                       |
| Currently under the care of a psychiatrist/psychologist                                            | 1 (1.4)                       |
| Nulliparous                                                                                        | 16 (21.9)                     |
| Previous stillbirth or neonatal death $\geq 20^{+0}$ weeks                                         | 22 (30.1)                     |
| Current twin pregnancy                                                                             | 1 (1.4)                       |
| Reasons for preterm birth clinic referral (non-exclusive)                                          |                               |
| Previous spontaneous preterm birth/PPROM (24 <sup>+0</sup> to 36 <sup>+0</sup> weeks) <sup>c</sup> | 30 (41.1)                     |
| Previous second trimester loss (16 <sup>+0</sup> to 23 <sup>+6</sup> weeks)                        | 23 (31.5)                     |

|                                                                |           |
|----------------------------------------------------------------|-----------|
| Previous extensive cervical surgery <sup>d</sup>               | 21 (28.8) |
| Congenital uterine anomaly                                     | 1 (1.4)   |
| Short cervix in current pregnancy <25 mm                       | 5 (6.8)   |
| ≥2 surgical terminations and/or other uterine instrumentations | 14 (19.2) |
| Other risk factors for spontaneous preterm birth               | 4 (5.5)   |
| Multiple reasons for referral to the preterm birth clinic      | 23 (31.5) |

SD, standard deviation; mm, millimetres; PPRM, pre-labour premature rupture of membranes; LLETZ, large loop excision of the transformation zone.

<sup>a</sup> Missing data n=2.

<sup>b</sup> Self-reported.

<sup>c</sup> Includes survivors born at 23 weeks of gestation.

<sup>d</sup> LLETZ with depth of excision ≥10 mm or >1 procedure, or knife cone biopsy.

The mean gestational ages at questionnaire completion were 13<sup>+4</sup> weeks (SD 3<sup>+3</sup>), 16<sup>+2</sup> weeks (SD 3<sup>+2</sup>) and 23<sup>+6</sup> weeks (SD 1<sup>+2</sup>). Anxiety, depression and quality of life scores and proportion of screen positive results (defined as >40 on the STAI state-anxiety scale and >12 on the EPDS) are shown in Table 2. MMRM analyses, adjusting for gestation at first visit, prior mental health condition and obstetric history (fixed effects), are described in Table 3. The primary outcome of the adjusted mean state-anxiety score was 39.0 at baseline and decreased to 36.5 after the second visit (least square means difference -2.5, 95% CI -5.5 to 0.5, *P*=0.1), with a further reduction to 32.6 after the last visit (least squares means difference -3.9 from the second visit, 95% CI -6.4 to -1.5, *P*=0.002). Adjusted secondary outcomes are reported in Table 3.

**Table 2. Anxiety, depression and quality of life scores (unadjusted)**

|                                                 | Set 1 (baseline), n=73 <sup>a</sup> |             | Set 2, n=69 <sup>a</sup>    |             | Set 3, n=63 <sup>a</sup>    |             |
|-------------------------------------------------|-------------------------------------|-------------|-----------------------------|-------------|-----------------------------|-------------|
|                                                 | Mean (SD) or proportion (%)         | 95% CI      | Mean (SD) or proportion (%) | 95% CI      | Mean (SD) or proportion (%) | 95% CI      |
| STAI state-anxiety score                        | 38.6 (11.9)                         | 36.8 – 41.3 | 36.2 (11.6)                 | 33.5 – 38.9 | 32.0 (9.8)                  | 29.6 – 34.4 |
| STAI state-anxiety positive screen <sup>b</sup> | 28/73 (38.4)                        | 27.2 – 49.5 | 24/69 (34.8)                | 23.5 – 46.0 | 12/63 (19.0)                | 9.4 – 28.7  |
| STAI trait-anxiety score                        | 37.3 (10.1)                         | 35.0 – 39.6 | 36.5 (9.6) <sup>c</sup>     | 34.2 – 38.8 | 34.9 (10.8)                 | 32.2 – 37.6 |
| STAI trait-anxiety positive screen <sup>b</sup> | 28/73 (38.4)                        | 27.2 – 49.5 | 23/68 (33.8) <sup>c</sup>   | 22.6 – 45.1 | 15/63 (23.8)                | 13.3 – 34.3 |
| EPDS score                                      | 7.3 (4.6)                           | 6.2 – 8.4   | 6.0 (4.5)                   | 4.9 – 7.1   | 5.4 (5.1)                   | 4.1 – 6.6   |
| EPDS positive screen <sup>d</sup>               | 10/73 (13.7)                        | 5.8 – 21.6  | 6/69 (8.7)                  | 2.0 – 15.3  | 6/63 (9.5)                  | 2.3 – 16.8  |
| Summary mental health score <sup>e</sup>        | 63.8 (15.9) <sup>e</sup>            | 60.0 – 67.8 | 65.7 (17.0) <sup>g</sup>    | 61.5 – 69.9 | 72.4 (17.9) <sup>f</sup>    | 67.8 – 77.0 |
| Summary physical health score <sup>e</sup>      | 69.3 (21.5) <sup>d</sup>            | 64.3 – 74.3 | 66.0 (24.1) <sup>i</sup>    | 60.2 – 71.8 | 71.3 (22.7) <sup>d</sup>    | 65.6 – 77.0 |
| Pregnancy-related anxiety <sup>j</sup>          | 4.9 (2.5) <sup>d</sup>              | 4.3 – 5.5   | -                           | -           | 2.7 (2.5)                   | 2.1 – 3.3   |

STAI, State Trait Anxiety Inventory; SD, standard deviation; CI, confidence interval; EPDS, Edinburgh Postnatal Depression Scale.

<sup>a</sup> Set 1 questionnaires were completed prior to the women's first clinic appointment (baseline); Set 2 after their second appointment (usually 2-3 weeks later); Set 3 after their last appointment (usually at 23-24 weeks of gestation).

<sup>b</sup> Positive screen defined as STAI score >40.

<sup>c</sup> Missing score for one woman as one incomplete question.

<sup>d</sup> Positive screen defined as EPDS >12.

<sup>e</sup> Using the RAND 36-Item Short Form Survey. Higher scores associated with better quality of life.

<sup>f</sup> Missing scores for nine women as one or more incomplete questions.

<sup>g</sup> Missing scores for five women as one or more incomplete questions.

<sup>h</sup> Missing scores for four women as one or more incomplete questions.

<sup>i</sup> Missing scores for three women as one or more incomplete questions.

<sup>j</sup> Visual analogue scale, 0 = not at all anxious, 10 = extremely anxious.

**Table 3. Mixed model for repeated measures analyses for anxiety, depression and quality of life scores**

| Fixed effect                               | STAI state-anxiety score |               |                | EPDS score           |               |                | Summary physical health score <sup>a</sup> |               |                | Summary mental health score <sup>a</sup> |               |                |
|--------------------------------------------|--------------------------|---------------|----------------|----------------------|---------------|----------------|--------------------------------------------|---------------|----------------|------------------------------------------|---------------|----------------|
|                                            | P value <sup>b</sup>     |               |                | P value <sup>b</sup> |               |                | P value <sup>b</sup>                       |               |                | P value <sup>b</sup>                     |               |                |
| Questionnaire set number                   | <0.0001                  |               |                | 0.0001               |               |                | 0.3                                        |               |                | <0.0001                                  |               |                |
| Gestation at first visit <sup>c</sup>      | 0.7                      |               |                | 0.4                  |               |                | 0.2                                        |               |                | 0.2                                      |               |                |
| Prior mental health condition <sup>c</sup> | 0.7                      |               |                | 0.09                 |               |                | 0.6                                        |               |                | 0.006                                    |               |                |
| Obstetric history <sup>c, d</sup>          | 0.4                      |               |                | 0.04                 |               |                | 0.8                                        |               |                | 0.3                                      |               |                |
| <b>Least squares means</b>                 | <b>Estimate</b>          | <b>95% CI</b> |                | <b>Estimate</b>      | <b>95% CI</b> |                | <b>Estimate</b>                            | <b>95% CI</b> |                | <b>Estimate</b>                          | <b>95% CI</b> |                |
| Set 1                                      | 39.0                     | 35.6 – 42.4   |                | 7.5                  | 6.1 – 8.9     |                | 70.9                                       | 63.9 – 77.8   |                | 60.7                                     | 55.8 – 65.6   |                |
| Set 2                                      | 36.5                     | 33.0 – 40.0   |                | 6.3                  | 4.9 – 7.7     |                | 67.2                                       | 60.1 – 74.4   |                | 62.5                                     | 57.5 – 67.4   |                |
| Set 3                                      | 32.6                     | 29.1 – 36.1   |                | 5.7                  | 4.3 – 7.1     |                | 71.5                                       | 64.3 – 78.6   |                | 69.5                                     | 64.6 – 74.5   |                |
| <b>Least squares means difference</b>      | <b>Estimate</b>          | <b>95% CI</b> | <b>P value</b> | <b>Estimate</b>      | <b>95% CI</b> | <b>P value</b> | <b>Estimate</b>                            | <b>95% CI</b> | <b>p value</b> | <b>Estimate</b>                          | <b>95% CI</b> | <b>P value</b> |
|                                            |                          |               | <sup>e</sup>   |                      |               | <sup>e</sup>   |                                            |               | <sup>e</sup>   |                                          |               | <sup>e</sup>   |
| Set 2 - 1                                  | -2.5                     | -5.5 – 0.5    | 0.1            | -1.2                 | -2.3 – -0.2   | 0.02           | -3.7                                       | -10.1 – 2.8   | 0.3            | 1.8                                      | -3.1 – 6.6    | 0.5            |
| Set 3 - 1                                  | -6.4                     | -8.8 – -4.0   | <0.0001        | -1.8                 | -2.6 – -1.0   | <0.0001        | 0.6                                        | -4.6 – 5.8    | 0.8            | 8.9                                      | 4.7 – 13.0    | <0.0001        |
| Set 3 - 2                                  | -3.9                     | -6.4 – -1.5   | 0.002          | -0.6                 | -1.4 – 0.2    | 0.2            | 4.2                                        | -1.1 – 9.6    | 0.1            | 7.1                                      | -3.0 – -11.2  | 0.001          |



1  
2  
3 STAI, State Trait Anxiety Inventory; EPDS, Edinburgh Postnatal Depression Scale; CI, confidence interval.  
4

5 <sup>a</sup> RAND 36-Item Short Form Survey. Higher scores associated with better quality of life.

6 <sup>b</sup> Pr > F. Type 3 tests of fixed effects.

7  
8 <sup>c</sup> Analysis adjusted for these factors.

9  
10 <sup>d</sup> Categorised by no previous pregnancy beyond 12 weeks; loss/preterm birth at 12-28 weeks; loss/preterm birth at 28-37 weeks; or term birth only.

11 <sup>e</sup> Pr > |t|  
12  
13  
14  
15  
16  
17  
18  
19  
20  
21  
22  
23  
24  
25  
26  
27  
28  
29  
30  
31  
32  
33  
34  
35  
36  
37  
38  
39  
40  
41  
42  
43  
44  
45  
46

For peer review only

1  
2  
3 One woman was referred to maternal mental health services following review of the EPDS self-  
4 harm question. Preterm birth clinic clinicians referred six women to the women's health social  
5 work for psychological support and two to maternal mental health services as part of routine  
6 practice. None of the women who completed the Set 3 questionnaires reported having a new  
7 diagnosis of a mental health condition during the study period made by a health practitioner.  
8 One woman declined to complete the last set of questionnaires after a diagnosis of severe  
9 depression.  
10  
11  
12  
13  
14  
15  
16

17 Women had mixed feelings about referral to the clinic prior to review, but following their last  
18 visit 56/63 (88.9%) reported care in the preterm birth clinic made them significantly or  
19 somewhat less anxious. The majority (55/63, 87.3%) would want to be cared for in a preterm  
20 birth clinic again in another pregnancy. The seven women who did not, had already had a term  
21 birth since their prior early birth, or were referred for cervical surgery or multiple uterine  
22 instrumentations only (and only one required an intervention greater than surveillance in their  
23 current pregnancy) (Supplementary Table 5).  
24  
25  
26  
27  
28  
29  
30

31 The predominant themes causing pregnancy-related anxiety at baseline were preterm birth,  
32 pregnancy loss, and concern for the baby's health. Many women were anxious about extremely  
33 early birth – *“being born too early to do anything about it,”* and were worried about reaching  
34 milestones – *“getting to 24 weeks to be deemed to have a ‘viable’ pregnancy.”* Women were  
35 worried about history repeating itself – *“I am scared that it might happen again,”* and how they  
36 would cope if it did – *“my ability to manage emotions associated with NICU [neonatal intensive  
37 care unit] if this baby is early.”* Fewer women were anxious about the risks of chromosomal or  
38 fetal anomalies.  
39  
40  
41  
42  
43  
44  
45

46 When asked at clinic discharge what they found most helpful to relieve pregnancy-related  
47 anxiety, the main theme was medical support, including close monitoring, the preterm birth  
48 clinic, regular ultrasound scans, and support and communication from doctors – *“the fortnightly  
49 visits have really helped me! Lots of reassurance,” “follow up from the preterm birth clinic,”*  
50 *“the weekly check-ups and reassurance from the doctors and how quickly they acted when there  
51 was an issue,”* and *“the support of specialists who are willing to listen.”* Other themes included  
52 support from family and friends, distraction, relaxation techniques and prayer.  
53  
54  
55  
56  
57  
58  
59  
60

The mean number of clinic visits was 5.4 (SD 2.1), range 1-11. Clinic interventions and pregnancy outcomes are reported in Table 4. Elective cervical cerclage is reserved for the highest risk women, and was performed in 17/72 cases (23.6%, excludes one woman with local follow up after the first visit as no further data collected), usually at 12-14 weeks gestation. The remaining women had ultrasound surveillance of cervical length as their primary management. The overall rate of birth <37 weeks was 17/72 (23.6%), including two spontaneous second trimester losses. One extremely early preterm birth followed pre-labour fetal demise, all other preterm births occurred following spontaneous labour or preterm pre-labour rupture of membranes. Of pregnancies that reached  $\geq 20^{+0}$  weeks 67/69 (97.1%) babies were alive at hospital discharge.

**Table 4. Preterm birth clinic interventions and pregnancy outcomes <sup>a</sup>**

| Characteristics                                                                         | Proportion (%) or mean (SD) |
|-----------------------------------------------------------------------------------------|-----------------------------|
| Shortest transvaginal cervical length measurement                                       |                             |
| Mean (SD) (in mm)                                                                       | 27.0 (9.1)                  |
| Range (in mm)                                                                           | 0-39                        |
| Number <25 mm (threshold for intervention)                                              | 21/72 (29.2)                |
| Treatments given to reduce the risk of preterm birth                                    |                             |
| Cervical cerclage only                                                                  | 16/72 (22.2)                |
| Vaginal progesterone only                                                               | 4/72 (5.6)                  |
| Both cervical cerclage and vaginal progesterone                                         | 10/72 (13.9)                |
| No treatment                                                                            | 40/72 (55.6)                |
| Antenatal hospital admission from clinic due to preterm birth risk                      | 2/72 (2.8)                  |
| Risk of preterm birth for those who had an exit visit <sup>b</sup>                      |                             |
| Low                                                                                     | 45/66 (68.2)                |
| Intermediate                                                                            | 18/66 (27.3)                |
| High                                                                                    | 3/66 (4.5)                  |
| Pregnancy outcome                                                                       |                             |
| Termination of pregnancy for fetal anomalies                                            | 2/72 (2.8)                  |
| First trimester miscarriage (<13 <sup>+0</sup> weeks)                                   | 1/72 (1.4)                  |
| Second trimester loss (13 <sup>+1</sup> to 22 <sup>+6</sup> weeks)                      | 2/72 (2.8)                  |
| Extremely early preterm birth (23 <sup>+0</sup> to 27 <sup>+6</sup> weeks) <sup>d</sup> | 3/72 (4.2)                  |
| Very early preterm birth (28 <sup>+0</sup> to 31 <sup>+6</sup> weeks)                   | 1/72 (1.4)                  |

|                                                                                   |              |
|-----------------------------------------------------------------------------------|--------------|
| Moderate to late preterm birth (32 <sup>+0</sup> to 36 <sup>+6</sup> weeks)       | 11/72 (15.3) |
| Term birth ( $\geq 37^{+0}$ weeks)                                                | 52/72 (72.2) |
| Mode of birth for pregnancies that reached $\geq 20^{+0}$ weeks <sup>e</sup>      |              |
| Normal vaginal birth                                                              | 44/68 (64.7) |
| Instrumental birth                                                                | 7/68 (10.3)  |
| Caesarean section                                                                 | 17/68 (25.0) |
| Neonatal outcome for pregnancies that reached $\geq 20^{+0}$ weeks <sup>e f</sup> |              |
| Alive at hospital discharge                                                       | 67/69 (97.1) |
| Early neonatal death                                                              | 1/69 (1.4)   |
| Stillbirth                                                                        | 1/69 (1.4)   |

<sup>a</sup> Excluding one with all follow up at local hospital after first visit as no further data collected.

<sup>b</sup> Risk assessment defined in Supplementary Table 4. Quantitative fetal fibronectin was included in 29/66 (44%) cases. Excludes six women who did not have an exit appointment. Includes three women who did not complete Set 3 questionnaires – for two the exit visit was their second visit, both were high risk and delivered prior to planned completion of the Set 3 questionnaires by post; and one who declined.

<sup>d</sup> Includes one pre-labour fetal demise.

<sup>e</sup> Excluding one termination of pregnancy >20 weeks.

<sup>f</sup> Includes one set of twins.

## DISCUSSION

This is the first study to assess the psychological wellbeing of women receiving care in a specialised preterm birth clinic. It identifies high rates of psychological distress, with 38.4% and 13.7% of women having significant symptoms of anxiety and depression, respectively, at the beginning of the second trimester. Whilst the change in mean state-anxiety scores after two clinic visits did not reach statistical significance, improvement may still be clinically important. Adjusted mean state-anxiety scores were significantly improved by clinic discharge, with rates of anxiety half that of baseline. Although depression was less common than anxiety, the adjusted mean EPDS score improved by the second clinic visit and this was sustained to the end of the second trimester. Quality of life improved with regard to mental health, but not physical health. Pregnancy-related anxiety scores also improved and women perceived care in the preterm birth clinic to be a significant factor in relieving anxiety.

1  
2  
3 A number of studies have reported rates of anxiety and depression in pregnancy, with a wide  
4 range of estimates.<sup>1,2</sup> In systematic review, the overall prevalence of a clinical diagnosis of an  
5 anxiety disorder in pregnancy was 15.2%, with rates of self-reported anxiety of 18.2%, 19.1%  
6 and 24.6% in the first, second and third trimesters respectively.<sup>2</sup> Women with high risk  
7 pregnancies have higher rates of anxiety than low risk women; 45.0% vs 16.7% in one study.<sup>23</sup>  
8 Rates of depression were 7.4%, 12.8% and 12.0% in the general pregnant population in the  
9 first, second and third trimesters,<sup>1</sup> and ranged from 11% to 28% in studies on high risk  
10 pregnancies.<sup>3,4,23,28,29</sup> The higher rates of anxiety seen in our study are consistent with published  
11 literature for high risk pregnancies with rates of depression in the lower range of those  
12 previously reported.  
13  
14  
15  
16  
17  
18  
19  
20  
21

22 Although we do not have data for the whole pregnancy, it seems that gestational changes in  
23 rates of anxiety in women at high risk of spontaneous preterm birth may not follow the same  
24 trends as in the general pregnant population in which rates rise throughout pregnancy.<sup>2</sup> In our  
25 study, anxiety was highest at the beginning of the second trimester and then decreased to levels  
26 similar to those seen in general pregnant populations by the end of the second trimester. This  
27 may be due to reduced anxiety over second trimester loss once this gestational time period is  
28 complete (31.5% of our cohort had experienced a second trimester loss previously). However,  
29 advancing gestation is unlikely to be the sole factor in anxiety levels returning to those of the  
30 general pregnant population, as the risk of early preterm birth was still ongoing at the time of  
31 last clinic visit. This, along with women's perception of care, suggests that preterm birth clinic  
32 care may have had a role in improving psychological wellbeing. The provision of an overall  
33 ongoing risk assessment at the final clinic visit is likely to be beneficial; the majority of women  
34 were considered to have a relatively low ongoing risk of preterm birth and encouraged to return  
35 to a low risk model of maternity care.  
36  
37  
38  
39  
40  
41  
42  
43  
44  
45  
46  
47

48 Whilst there is some evidence that simply labelling a pregnancy 'high risk' may increase  
49 anxiety and fear, other studies identified that women embrace this label in a positive way.<sup>10,11</sup>  
50 A qualitative study has assessed women's perceptions of care in a preterm birth clinic in the  
51 United Kingdom, with all women viewing their high risk status positively.<sup>11</sup> These women  
52 reported that regular reassurance from the clinic was a helpful coping strategy and that other  
53 health professionals were not always sensitive to their worries about having another preterm  
54 birth.<sup>11</sup> Our results are consistent with these findings.  
55  
56  
57  
58  
59  
60

1  
2  
3 Preterm birth clinics offer individualised, coordinated and evidence-based care with the aim of  
4 reducing spontaneous preterm birth and improving perinatal outcome. Any potential to reduce  
5 psychological distress is an additional benefit. Further research should aim to include a  
6 comparison group to more directly quantify the effect of preterm birth clinics in improving  
7 psychological wellbeing. A larger sample size would also be required to direct practice change  
8 if considering the psychological, as well as clinical, benefit of preterm birth clinics. However  
9 the new knowledge from our study should reassure clinicians and policy makers that preterm  
10 birth clinics do not seem to cause psychological harm.  
11  
12  
13  
14  
15  
16  
17  
18

19 Symptoms of anxiety and depression were under-recognised by clinicians in this study, with  
20 low referral rates for psychological support or maternal mental health review based on usual  
21 indications. Early recognition of anxiety and depression with provision of support or referral  
22 for other interventions may reduce maternal morbidity and improve pregnancy outcomes, and  
23 is likely to reduce the risk of postnatal depression.<sup>30</sup> Our findings suggest there are currently  
24 missed opportunities for care and preterm birth clinics should ensure they have referral  
25 pathways and access to psychological assessment and support, or should incorporate this into  
26 part of standard care within the clinic.  
27  
28  
29  
30  
31  
32  
33

34 The main limitations of our study are the lack of a comparison group and modest sample size.  
35 The most appropriate comparison is with women of similar preterm birth risk who do not  
36 receive care in a preterm birth clinic; however, withholding clinic care is not possible when a  
37 clinic is well established within an area and available to all. Use of the general population or a  
38 medically high risk group as a comparator is not appropriate as background anxiety levels for  
39 these women may increase over gestation due to increasing risk of other pregnancy  
40 complications, whereas the risk of preterm birth decreases with advancing gestation. Sample  
41 size was directed by the duration of the study and the number of women referred to the preterm  
42 birth clinic over the 12 month period. We are aware that not all women eligible for the clinic  
43 (and therefore for the study) were referred during this time period, and the women seen may  
44 have a higher risk profile than those who were eligible but not referred.  
45  
46  
47  
48  
49  
50  
51  
52  
53

54 A further limitation is the use of screening tests rather than diagnostic criteria for anxiety and  
55 depression. Whilst diagnostic interviews are the gold standard, they are time consuming, require  
56 special training and are expensive.<sup>31</sup> Screening tests are reliable and have been validated for use  
57 in pregnancy.<sup>28,32-38</sup> The STAI with a cut-off >40 has a sensitivity of 81% and specificity of  
58  
59  
60

1  
2  
3 80% for diagnosis of an anxiety disorder in pregnancy when compared to DSM-IV criteria.<sup>39</sup>  
4  
5 The EPDS is also accurate, with a cut-off of >12 used in pregnancy, giving a sensitivity of 83%  
6 and specificity of 90% for detection of major depression.<sup>40</sup> Participant dropout may have  
7 influenced the study outcome as the majority were due to pregnancy loss or extremely early  
8 preterm birth, and these women may have had the highest risk pregnancies and hence highest  
9 levels of psychological distress. However, unadjusted analysis of only the 63 women who  
10 completed all assessments showed similar results to those presented here.  
11  
12  
13  
14  
15  
16

17 Strengths of this study include longitudinal assessment of a high risk cohort with a high  
18 recruitment rate in an ethnically diverse group of women. Although undertaken at a single site,  
19 referrals are accepted from the wider region, improving generalisability of results. There were  
20 multiple clinicians working in the clinic over the study period (two lead obstetricians, three  
21 senior obstetric trainees, and three specialist midwives), so an individual clinician is unlikely  
22 to have had significant influence over outcomes. Variation in practice between preterm birth  
23 clinics has been recognised as an issue,<sup>41,42</sup> however the general principles of care identified by  
24 women as factors that reduced anxiety i.e. close surveillance and regular ultrasound scans, are  
25 similar across clinics globally.  
26  
27  
28  
29  
30  
31  
32  
33

## 34 CONCLUSION

35  
36  
37 Women at increased risk of spontaneous preterm birth are more likely to have higher levels of  
38 anxiety in early pregnancy. Improvements in psychological wellbeing were seen during the time  
39 these women were cared for in a specialised preterm birth clinic through the second trimester.  
40 Women's perceptions of a preterm birth clinic were favourable and they attributed the care  
41 received as being a significant factor in reducing pregnancy-related anxiety. Findings of this  
42 study support the ongoing use and development of these specialised clinics.  
43  
44  
45  
46  
47  
48  
49  
50  
51  
52  
53  
54  
55  
56  
57  
58  
59  
60

## FIGURE LEGEND

### Figure 1. Participant recruitment and study flow diagram

TOP, termination of pregnancy.

<sup>a</sup> Reasons not eligible: 19 were pre-pregnancy consultations, 2 had previously participated in study (both with pregnancy losses), 9 had insufficient English (including one who provided consent but was then identified to have insufficient written English when attempted first set of questionnaires and was withdrawn from the study), 3 were >24 weeks at first visit, and 12 had a single visit planned only.

<sup>b</sup> Distressed with new diagnosis of severe hypertension and fetal growth restriction, subsequently had fetal demise before last visit.

<sup>c</sup> Gestational ages at delivery 16<sup>+1</sup>, 22<sup>+3</sup>, 23<sup>+4</sup> and 24<sup>+4</sup> weeks.

<sup>d</sup> Recent diagnosis of severe depression with acute distress.



### **Acknowledgements**

The authors would like to acknowledge the women who participated in this study and the midwifery and clerical staff at National Women's Health who provided administrative support.

### **Competing interests statement**

None of the authors have any competing interests to declare.

### **Funding statement**

This work was supported by the Auckland Medical Research Foundation Ruth Spencer Fellowship (no grant number), Mercia Barnes Trust (no grant number) and Hugo Charitable Trust (grant number 3715802).

### **Data sharing statement**

Not applicable.

### **Contribution to authorship**

All authors fulfil the authorship requirements described by the International Committee of Medical Journal Editors. LD was the lead investigator and was responsible for writing the first draft of the study protocol, obtaining ethical approval, the majority of data collection and analysis and wrote the first draft of the manuscript. KG was the supervising investigator, she conceived the idea for the study and provided substantial contribution to the study protocol, ethical approvals, analysis and interpretation of results. AL made substantial contributions to the statistical analyses and interpretation of results. JW made substantial contributions to the study design and interpretation of results. All authors critically reviewed the manuscript and approved the final version of the manuscript submitted for publication.

## References

1. Bennett HA, Einarson A, Taddio A, et al. Prevalence of depression during pregnancy: Systematic review. *Obstet Gynecol.* 2004;103(4):698-709.
2. Dennis C-L, Falah-Hassani K, Shiri R. Prevalence of antenatal and postnatal anxiety: Systematic review and meta-analysis. *Br J Psychiatry.* 2017;210(5):315-23.
3. Dagklis T, Tsakiridis I, Chouliara F, et al. Antenatal depression among women hospitalized due to threatened preterm labor in a high-risk pregnancy unit in Greece. *J Matern Fetal Neonatal Med.* 2018;31(7):919-25.
4. Thiagayson P, Krishnaswamy G, Lim ML, et al. Depression and anxiety in Singaporean high-risk pregnancies: Prevalence and screening. *Gen Hosp Psychiatry.* 2013;35(2):112-6.
5. Fairbrother N, Young AH, Zhang A, et al. The prevalence and incidence of perinatal anxiety disorders among women experiencing a medically complicated pregnancy. *Arch Womens Ment Health.* 2017;20(2):311-9.
6. Vernet G, Watson H, Ridout A, et al. The role of PTB clinics: A review of the screening methods, interventions and evidence for preterm birth surveillance clinics for high-risk asymptomatic women. *Womens Health Bulletin.* 2017;4(4):2-9.
7. National Institute for Health and Care Excellence. Preterm Labour and Birth 2015. Available from: <https://www.nice.org.uk/guidance/ng25/resources/preterm-labour-and-birth-pdf-1837333576645>.
8. Jin W, Hughes K, Sim S, et al. The contemporary value of dedicated preterm birth clinics for high-risk singleton pregnancies: fifteen-year outcomes from a laeding maternal centre. *J Perinat Med.* Published online first: 20 May 2021. doi:10.1515/jpm-2021-0020.
9. Stahl K, Hundley V. Risk and risk assessment in pregnancy; do we scare because we care? *Midwifery.* 2003;19(4):298-309.
10. Simmons HA, Goldberg LS. 'High-risk' pregnancy after perinatal loss: Understanding the label. *Midwifery.* 2011;27(4):452-7.
11. O'Brien ET, Quenby S, Lavender T. Women's views of high risk pregnancy under threat of preterm birth. *Sex Reprod Healthc.* 2010;1(3):79-84.
12. Malouf R, Redshaw M. Specialist antenatal clinics for women at high risk of preterm birth: A systematic review of qualitative and quantitative research. *BMC Pregnancy Childbirth.* 2017;17(1):51.

13. Grigoriadis S, VonderPorten EH, Mamisashvili L, et al. The impact of maternal depression during pregnancy on perinatal outcomes: A systematic review and meta-analysis. *J Clin Psychiatry*. 2013;74(4):e321-41.
14. Grote NK, Bridge JA, Gavin AR, et al. A meta-analysis of depression during pregnancy and the risk of preterm birth, low birth weight, and intrauterine growth restriction. *Arch Gen Psychiatry*. 2010;67(10):1012-24.
15. Field T. Prenatal anxiety effects: A review. *Infant Behav Dev*. 2017;49:120-8.
16. Robertson E, Grace S, Wallington T, et al. Antenatal risk factors for postpartum depression: A synthesis of recent literature. *Gen Hosp Psychiatry*. 2004;26(4):289-95.
17. Giardinelli L, Innocenti A, Benni L, et al. Depression and anxiety in perinatal period: Prevalence and risk factors in an Italian sample. *Arch Womens Ment Health*. 2012;15(1):21-30.
18. Mind Garden. State-Trait Anxiety Inventory for Adults: Mind Garden; 2018 [Available from: <https://www.mindgarden.com/145-state-trait-anxiety-inventory-for-adults>].
19. Spielberger C, Gorsuch R, Lushene R. STAI: Manual for the State-Trait Anxiety Inventory (STAI). California: Consulting Psychologists Press; 1970.
20. Cox JL, Holden JM, Sagovsky R. Detection of postnatal depression: Development of the 10-item edinburgh postnatal depression scale. *Br J Psychiatry*. 1987;150(6):782-6.
21. Ware JE, Sherbourne CD. The MOS 36-Item Short-Form Health Survey (SF-36): I. Conceptual framework and item selection. *Med Care*. 1992;30(6):473-83.
22. RAND Corporation. 36-Item Short Form Survey (SF-36) 2018 [Available from: [https://www.rand.org/health/surveys\\_tools/mos/36-item-short-form.html](https://www.rand.org/health/surveys_tools/mos/36-item-short-form.html)].
23. King NMA, Chambers J, O'Donnell K, et al. Anxiety, depression and saliva cortisol in women with a medical disorder during pregnancy. *Arch Womens Ment Health*. 2010;13(4):339-45.
24. IBM Corp. IBM SPSS Statistics for Windows. 25.0 ed. New York: IBM Corp; 2017.
25. R Core Team. R: A language and environment for statistical computing. 3.5.3 ed. Vienna, Austria: R Foundation for Statistical Computing; 2019.
26. Braun V, Clarke V. Using thematic analysis in psychology. *Qualitative Research in Psychology*. 2006;3(2):77-101.
27. SAS Institute. SAS Software. 9.4 ed. Cary, NC: SAS Institute; 2017.
28. Adouard F, Glangeaud-Freudenthal NMC, Golse B. Validation of the Edinburgh Postnatal Depression Scale (EPDS) in a sample of women with high-risk pregnancies in France. *Arch Womens Ment Health*. 2005;8(2):89-95.

- 1
  - 2
  - 3
  - 4
  - 5
  - 6
  - 7
  - 8
  - 9
  - 10
  - 11
  - 12
  - 13
  - 14
  - 15
  - 16
  - 17
  - 18
  - 19
  - 20
  - 21
  - 22
  - 23
  - 24
  - 25
  - 26
  - 27
  - 28
  - 29
  - 30
  - 31
  - 32
  - 33
  - 34
  - 35
  - 36
  - 37
  - 38
  - 39
  - 40
  - 41
  - 42
  - 43
  - 44
  - 45
  - 46
  - 47
  - 48
  - 49
  - 50
  - 51
  - 52
  - 53
  - 54
  - 55
  - 56
  - 57
  - 58
  - 59
  - 60
29. Brandon AR, Trivedi MH, Hynan LS, et al. Prenatal depression in women hospitalized for obstetric risk. *J Clin Psychiatry*. 2008;69(4):635-43.
30. Austin M. Antenatal screening and early intervention for “perinatal” distress, depression and anxiety: where to from here? *Arch Womens Ment Health*. 2004;7(1):1-6.
31. Evans K, Spiby H, Morrell CJ. A psychometric systematic review of self-report instruments to identify anxiety in pregnancy. *J Adv Nurs*. 2015;71(9):1986-2001.
32. Gunning MD, Denison FC, Stockley CJ, et al. Assessing maternal anxiety in pregnancy with the State-Trait Anxiety Inventory (STAI): Issues of validity, location and participation. *J Reprod Infant Psychol*. 2010;28(3):266-73.
33. Grant N, Raouf S. A prospective population-based study to investigate the effectiveness of interventions to prevent preterm birth. *BJOG*. 2016;123:96.
34. Murray D, Cox JL. Screening for depression during pregnancy with the Edinburgh Depression Scale (EPDS). *J Reprod Infant Psychol*. 1990;8(2):99-107.
35. Bunevicius A, Kusminskas L, Pop VJ, et al. Screening for antenatal depression with the Edinburgh Depression Scale. *J Psychosom Obstet Gynecol*. 2009;30(4):238-43.
36. Gibson J, McKenzie-McHarg K, Shakespeare J, et al. A systematic review of studies validating the Edinburgh Postnatal Depression Scale in antepartum and postpartum women. *Acta Psychiatr Scand*. 2009;119(5):350-64.
37. Adewuya AO, Ola BA, Dada AO, et al. Validation of the Edinburgh Postnatal Depression Scale as a screening tool for depression in late pregnancy among Nigerian women. *J Psychosom Obstet Gynecol*. 2006;27(4):267-72.
38. Felice E, Saliba J, Grech V, et al. Validation of the Maltese version of the Edinburgh Postnatal Depression Scale. *Arch Womens Ment Health*. 2006;9(2):75-80.
39. Grant K, McMahon C, Austin M-P. Maternal anxiety during the transition to parenthood: A prospective study. *J Affect Disord*. 2008;108(1):101-11.
40. National Institute of Health and Clinical Excellence. Antenatal and Postnatal Mental Health: Clinical Management and Service Guidance 2014. Available from: <https://www.nice.org.uk/guidance/cg192>.
41. Care A, Ingleby L, Alfirovic Z, et al. The influence of the introduction of national guidelines on preterm birth prevention practice: UK experience. *BJOG*. 2019;126(6):763-9.

- 1  
2  
3 42. Dawes L, Groom K, Jordan V, et al. The use of specialised preterm birth clinics for  
4 women at high risk of spontaneous preterm birth: a systematic review. *BMC Pregnancy*  
5 *Childbirth*. 2020;20(1):58.  
6  
7  
8  
9  
10  
11  
12  
13  
14  
15  
16  
17  
18  
19  
20  
21  
22  
23  
24  
25  
26  
27  
28  
29  
30  
31  
32  
33  
34  
35  
36  
37  
38  
39  
40  
41  
42  
43  
44  
45  
46  
47  
48  
49  
50  
51  
52  
53  
54  
55  
56  
57  
58  
59  
60

For peer review only



## Supplementary Information

Supplementary Table 1. Standard practice in the preterm birth clinic

|                                                |                                                                                                                                                                                                                                                                                                                                                                                                                                                                                                                                                                                                                                                                                                                                                                                                                                                                                                                                                                                      |
|------------------------------------------------|--------------------------------------------------------------------------------------------------------------------------------------------------------------------------------------------------------------------------------------------------------------------------------------------------------------------------------------------------------------------------------------------------------------------------------------------------------------------------------------------------------------------------------------------------------------------------------------------------------------------------------------------------------------------------------------------------------------------------------------------------------------------------------------------------------------------------------------------------------------------------------------------------------------------------------------------------------------------------------------|
| <b>Clinic referral criteria</b>                | <p>At least one of the following risk factors for spontaneous preterm birth:</p> <ul style="list-style-type: none"> <li>▪ Previous spontaneous preterm birth or PPROM &lt;36 weeks of gestation</li> <li>▪ Previous spontaneous second trimester loss at 16<sup>+0</sup> to 24<sup>+0</sup> weeks of gestation</li> <li>▪ Previous LLETZ with &gt;10 mm depth of excision or ≥2 procedures of any depth</li> <li>▪ Previous knife cone biopsy or trachelectomy</li> <li>▪ Congenital uterine and/or cervical anomaly</li> <li>▪ Short cervix detected on transvaginal ultrasound scan in current pregnancy of &lt;25 mm at &lt;24<sup>+0</sup> weeks of gestation</li> <li>▪ Other risk factors e.g. ≥2 surgical termination of pregnancy and/or evacuation of retained products of conception procedures, complicated caesarean section at full dilatation, history of diethylstilboestrol exposure (woman or her mother), known collagen or connective tissue disorders</li> </ul> |
| <b>Initial consultation at around 12 weeks</b> | <p>Obstetric and medical review is undertaken to identify risk factors for preterm birth, along with vaginal examination, microbiological swabs, midstream urine for culture and transvaginal ultrasound assessment of the cervix.<sup>1</sup> Women are provided with information regarding their individualised risk for preterm birth and counselled on potential interventions including lifestyle and behaviour change (including support for smoking cessation), serial cervical length assessment, cervical cerclage and progesterone therapy, and an individualised plan of care is made. History-indicated (elective) cervical cerclage is generally reserved for women with multiple second trimester miscarriages or spontaneous preterm births, in line with current evidence.<sup>2</sup> Progesterone is not offered as prophylactic treatment and use is considered only in women who develop a short cervix.</p>                                                     |
| <b>Psychological support</b>                   | <p>Clinician assessment of psychological wellbeing was performed during routine clinical assessment. Referral to women's health social work or maternal mental health services was offered to women identified as needing additional psychological support.</p>                                                                                                                                                                                                                                                                                                                                                                                                                                                                                                                                                                                                                                                                                                                      |
| <b>Subsequent reviews</b>                      | <p>In the majority of cases, subsequent visits are fortnightly from 14 to 24 weeks and include a review of pregnancy progress and transvaginal ultrasound assessment of the cervix. Ultrasound-indicated cervical cerclage or vaginal progesterone are recommended if the cervix shortens to &lt;25 mm. Decisions regarding these interventions are made on an individual basis including further review of risk factors, other signs and symptoms and cervical length.</p>                                                                                                                                                                                                                                                                                                                                                                                                                                                                                                          |
| <b>On-going care</b>                           | <p>Women are discharged back to their lead maternity carer at 23 to 25 weeks. An overall risk assessment for very early preterm birth is</p>                                                                                                                                                                                                                                                                                                                                                                                                                                                                                                                                                                                                                                                                                                                                                                                                                                         |

|  |                                                                                                                                                                                                                                                                                                                                                                                        |
|--|----------------------------------------------------------------------------------------------------------------------------------------------------------------------------------------------------------------------------------------------------------------------------------------------------------------------------------------------------------------------------------------|
|  | made at the final visit and includes the selective use of quantitative fetal fibronectin and the QUiPP App for those thought at highest risk. The QUiPP App <sup>3</sup> combines history, cervical length and fetal fibronectin to predict spontaneous preterm birth within certain timeframes and is used to guide decisions on hospital admission and antenatal corticosteroid use. |
|--|----------------------------------------------------------------------------------------------------------------------------------------------------------------------------------------------------------------------------------------------------------------------------------------------------------------------------------------------------------------------------------------|

LLETZ, large loop excision of the transformation zone; PPROM, preterm pre-labour rupture of membranes.

For peer review only



Supplementary Table 2. Study specific questionnaires from Set 1

| Study specific questionnaire Set 1 |                                                                                                                                                                                                                                                                                                                                                                                                                                                                                        |
|------------------------------------|----------------------------------------------------------------------------------------------------------------------------------------------------------------------------------------------------------------------------------------------------------------------------------------------------------------------------------------------------------------------------------------------------------------------------------------------------------------------------------------|
| 1.                                 | Which ethnic group do you belong to? Mark the space or spaces which apply to you.<br><input type="checkbox"/> New Zealand European<br><input type="checkbox"/> Māori<br><input type="checkbox"/> Samoan<br><input type="checkbox"/> Cook Island Māori<br><input type="checkbox"/> Tongan<br><input type="checkbox"/> Niuean<br><input type="checkbox"/> Chinese<br><input type="checkbox"/> Indian<br><input type="checkbox"/> Other such as Dutch, Japanese, Tokelauan. Please state: |
| 2.                                 | Were you aware that you had an increased risk of your baby being born early in this pregnancy before you got pregnant?<br><input type="checkbox"/> Yes      If yes, please go to question 3<br><input type="checkbox"/> No      If no, please go to question 4                                                                                                                                                                                                                         |
| 3.                                 | Did you contemplate not getting pregnant prior to this pregnancy because you were worried about your increased chance of having a baby born early?<br><input type="checkbox"/> Yes<br><input type="checkbox"/> No                                                                                                                                                                                                                                                                      |
| 4.                                 | Once you were pregnant, did your lead maternity carer (midwife, GP or obstetrician) identify that there was an increased chance of your baby being born early in this pregnancy?<br><input type="checkbox"/> Yes      If yes, please go to question 5<br><input type="checkbox"/> No      If no, please go to question 6                                                                                                                                                               |
| 5.                                 | How did you feel when your lead maternity carer (midwife, GP or obstetrician) identified that there was an increased chance of your baby being born early in this pregnancy?<br><input type="checkbox"/> Very anxious<br><input type="checkbox"/> Somewhat anxious<br><input type="checkbox"/> No different / the same<br><input type="checkbox"/> Somewhat reassured<br><input type="checkbox"/> Very reassured                                                                       |
| 6.                                 | How did you feel after your maternity care provider (midwife, GP or obstetrician) suggested you come to the Preterm Birth Clinic?<br><input type="checkbox"/> Significantly more anxious<br><input type="checkbox"/> Somewhat more anxious<br><input type="checkbox"/> No different / the same<br><input type="checkbox"/> Somewhat more reassured<br><input type="checkbox"/> Significantly more reassured                                                                            |
| 7.                                 | How did you feel after you read the pamphlet about what to expect in the Preterm Birth Clinic that was included with your appointment details?<br><input type="checkbox"/> Significantly more anxious<br><input type="checkbox"/> Somewhat more anxious<br><input type="checkbox"/> No different / the same<br><input type="checkbox"/> Somewhat more reassured                                                                                                                        |

|    |                                                                                                           |
|----|-----------------------------------------------------------------------------------------------------------|
| 1  | <input type="checkbox"/> Significantly more reassured                                                     |
| 2  |                                                                                                           |
| 3  |                                                                                                           |
| 4  | 8. Do you have a partner?                                                                                 |
| 5  | <input type="checkbox"/> Yes                                                                              |
| 6  | <input type="checkbox"/> No                                                                               |
| 7  |                                                                                                           |
| 8  | 9. How would you describe your social support network (for example your partner,                          |
| 9  | whānau/family, friends)?                                                                                  |
| 10 | <input type="checkbox"/> Very unsupportive                                                                |
| 11 | <input type="checkbox"/> Somewhat unsupportive                                                            |
| 12 | <input type="checkbox"/> Neither supportive nor unsupportive                                              |
| 13 | <input type="checkbox"/> Somewhat supportive                                                              |
| 14 | <input type="checkbox"/> Very supportive                                                                  |
| 15 |                                                                                                           |
| 16 | 10. Note how anxious (on average) you have felt about your pregnancy over the past 7                      |
| 17 | days with a mark ( ) on the line below.                                                                   |
| 18 |                                                                                                           |
| 19 |                                                                                                           |
| 20 |                                                                                                           |
| 21 | 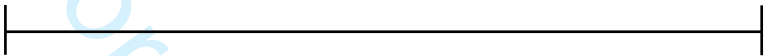                        |
| 22 | Not at all                                                                                                |
| 23 | anxious                                                                                                   |
| 24 | Extremely                                                                                                 |
| 25 | anxious                                                                                                   |
| 26 | 11. What are you most anxious about in this pregnancy? ( <i>space for response</i> )                      |
| 27 | 12. What do you find most helpful to relieve any pregnancy-related anxiety? ( <i>space for response</i> ) |
| 28 | 13. Have you ever been diagnosed with any of the following mental health conditions?                      |
| 29 | <input type="checkbox"/> Depression                                                                       |
| 30 | <input type="checkbox"/> Postnatal depression                                                             |
| 31 | <input type="checkbox"/> Generalised anxiety disorder                                                     |
| 32 | <input type="checkbox"/> Post-traumatic stress disorder                                                   |
| 33 | <input type="checkbox"/> Social anxiety disorder                                                          |
| 34 | <input type="checkbox"/> Panic disorder                                                                   |
| 35 | <input type="checkbox"/> Obsessive-compulsive disorder                                                    |
| 36 | <input type="checkbox"/> Bipolar disorder                                                                 |
| 37 | <input type="checkbox"/> Schizophrenia                                                                    |
| 38 | <input type="checkbox"/> Borderline personality disorder                                                  |
| 39 | <input type="checkbox"/> Other, please name _____                                                         |
| 40 | <input type="checkbox"/> None                                                                             |
| 41 |                                                                                                           |
| 42 | 14. Are you currently taking any prescribed medication for a mental health condition?                     |
| 43 | <input type="checkbox"/> Yes. If so, what is the name of this medication? _____                           |
| 44 | <input type="checkbox"/> No                                                                               |
| 45 |                                                                                                           |
| 46 | 15. Have you ever taken any prescribed medication for a mental health condition?                          |
| 47 | <input type="checkbox"/> Yes. If so, what is the name of this medication? _____                           |
| 48 | <input type="checkbox"/> No                                                                               |
| 49 |                                                                                                           |
| 50 | 16. Are you currently under the care of a psychiatrist or psychologist?                                   |
| 51 | <input type="checkbox"/> Yes. If so, what is this for? _____                                              |
| 52 | <input type="checkbox"/> No                                                                               |
| 53 |                                                                                                           |
| 54 | 17. Have you ever been seen by a psychiatrist?                                                            |
| 55 | <input type="checkbox"/> Yes. If so, when was this and what was it for? _____                             |
| 56 | <input type="checkbox"/> No                                                                               |
| 57 |                                                                                                           |
| 58 | 18. Are you taking any pregnancy supplements or probiotics, other than folic acid, Elevit                 |
| 59 | or iodine?                                                                                                |
| 60 |                                                                                                           |

- 1  
2  
3  
4  
5  
6  
7  
8  
9  
10  
11  
12  
13  
14  
15  
16  
17  
18  
19  
20  
21  
22  
23  
24  
25  
26  
27  
28  
29  
30  
31  
32  
33  
34  
35  
36  
37  
38  
39  
40  
41  
42  
43  
44  
45  
46  
47  
48  
49  
50  
51  
52  
53  
54  
55  
56  
57  
58  
59  
60
- |                                                                                  |
|----------------------------------------------------------------------------------|
| <input type="checkbox"/> Yes. If so, what is the name of the supplement/s? _____ |
| <input type="checkbox"/> No                                                      |

For peer review only

Supplementary Table 3. Study specific questionnaires from Set 3

| Study specific questionnaire Set 3 |                                                                                                                                                                                                                                                                                                                                                                                       |
|------------------------------------|---------------------------------------------------------------------------------------------------------------------------------------------------------------------------------------------------------------------------------------------------------------------------------------------------------------------------------------------------------------------------------------|
| 1.                                 | How have you found the quality of your general pregnancy care?<br><input type="checkbox"/> Very low quality<br><input type="checkbox"/> Low quality<br><input type="checkbox"/> Neither high or low quality<br><input type="checkbox"/> High quality<br><input type="checkbox"/> Very high quality                                                                                    |
| 2.                                 | How have you found the quality of your care through the Preterm Birth Clinic?<br><input type="checkbox"/> Very low quality<br><input type="checkbox"/> Low quality<br><input type="checkbox"/> Neither high or low quality<br><input type="checkbox"/> High quality<br><input type="checkbox"/> Very high quality                                                                     |
| 3.                                 | Do you think that being seen in a preterm birth clinic made you more or less anxious about your pregnancy?<br><input type="checkbox"/> Significantly more anxious<br><input type="checkbox"/> Somewhat more anxious<br><input type="checkbox"/> Neither more or less anxious<br><input type="checkbox"/> Somewhat less anxious<br><input type="checkbox"/> Significantly less anxious |
| 4.                                 | If you have another pregnancy, would you want to be cared for through a preterm birth clinic again?<br><input type="checkbox"/> Yes<br><input type="checkbox"/> No<br><input type="checkbox"/> Unsure                                                                                                                                                                                 |
| 5.                                 | Note how anxious (on average) you have felt about your pregnancy over the past 7 days with a mark ( ) on the line below.<br><div style="text-align: center;"> 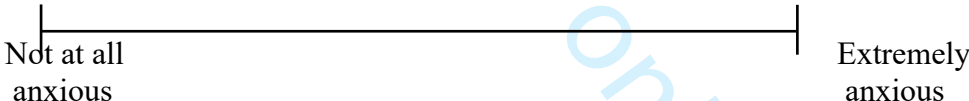 </div>                                                                                                                             |
| 6.                                 | What are you most anxious about in this pregnancy? ( <i>space for response</i> )                                                                                                                                                                                                                                                                                                      |
| 7.                                 | What do you find most helpful to relieve any pregnancy-related anxiety? ( <i>space for response</i> )                                                                                                                                                                                                                                                                                 |
| 8.                                 | Have you been diagnosed with a mental health condition since you were first seen in the Preterm Birth Clinic this pregnancy?<br><input type="checkbox"/> Yes, if so please provide details _____<br><input type="checkbox"/> No                                                                                                                                                       |

**Supplementary Table 4. Criteria for risk classification for study purposes at discharge from the preterm birth clinic**

| <b>Risk classification</b> | <b>Criteria</b>                                                                                                                                                                                                                                      |
|----------------------------|------------------------------------------------------------------------------------------------------------------------------------------------------------------------------------------------------------------------------------------------------|
| Low                        | Cervical length >25 mm, AND<br>Quantitative fetal fibronectin level of <50 ng/ml if performed (based on usual clinical indications), AND<br>No intervention (progesterone or cerclage) required during the current pregnancy due to cervical change  |
| Intermediate               | Shortened cervical length to 11-25 mm, AND/OR<br>Quantitative fetal fibronectin level of 50-199 ng/ml if performed (based on usual indications), AND/OR<br>Need for progesterone and/or cerclage during the current pregnancy due to cervical change |
| High                       | Shortened cervical length to <10 mm, AND/OR<br>Quantitative fetal fibronectin level of $\geq$ 200 ng/ml if performed (based on usual indications)                                                                                                    |

**Supplementary Table 5. Women's knowledge of their preterm birth risk and their perceptions of preterm birth clinic care**

| Question and response                                                                                                                                                      | Number (%)   |
|----------------------------------------------------------------------------------------------------------------------------------------------------------------------------|--------------|
| <b>Set 1 (baseline)</b>                                                                                                                                                    |              |
| 1. Were you aware that you had an increased risk of your baby being born early before you got pregnant?                                                                    |              |
| Yes                                                                                                                                                                        | 59/73 (80.8) |
| No                                                                                                                                                                         | 14/73 (19.2) |
| 2. Did you contemplate not getting pregnant because you were worried about your increased chance of having a baby born early? <sup>a</sup>                                 |              |
| Yes                                                                                                                                                                        | 19/59 (32.2) |
| No                                                                                                                                                                         | 40/59 (67.8) |
| 3. Once you were pregnant, did your lead maternity carer (midwife, GP or obstetrician) identify that there was an increased chance of your baby being born early?          |              |
| Yes                                                                                                                                                                        | 51/71 (71.8) |
| No                                                                                                                                                                         | 20/71 (28.2) |
| 4. How did you feel when your lead maternity carer (midwife, GP or obstetrician) identified that there was an increased chance of your baby being born early? <sup>b</sup> |              |
| Very anxious                                                                                                                                                               | 11/51 (21.6) |
| Somewhat anxious                                                                                                                                                           | 20/51 (39.2) |
| Neither anxious nor relieved                                                                                                                                               | 12/51 (23.5) |
| Somewhat relieved                                                                                                                                                          | 5/51 (9.8)   |
| Very relieved                                                                                                                                                              | 3/51 (5.9)   |
| 5. How did you feel after your maternity care provider (midwife, GP or obstetrician) suggested you come to the Preterm Birth Clinic?                                       |              |
| Significantly more anxious                                                                                                                                                 | 8/71 (11.3)  |
| Somewhat more anxious                                                                                                                                                      | 12/71 (16.9) |
| Neither more or less anxious                                                                                                                                               | 11/71 (15.5) |
| Somewhat less anxious                                                                                                                                                      | 24/71 (33.8) |
| Significantly less anxious                                                                                                                                                 | 16/71 (22.5) |
| 6. How did you feel after you read the pamphlet about what to expect in the Preterm Birth Clinic that was included with your appointment details?                          |              |
| Significantly more anxious                                                                                                                                                 | 1/69 (1.4)   |
| Somewhat more anxious                                                                                                                                                      | 13/69 (18.8) |
| Neither more or less anxious                                                                                                                                               | 30/69 (43.5) |
| Somewhat less anxious                                                                                                                                                      | 20/69 (29.0) |
| Significantly less anxious                                                                                                                                                 | 5/69 (7.2)   |
| 8. How would you describe your social support network (for example your partner, whānau/family, friends)?                                                                  |              |
| Very unsupportive                                                                                                                                                          | 7/72 (9.7)   |
| Somewhat unsupportive                                                                                                                                                      | 1/72 (1.4)   |
| Neither supportive nor unsupportive                                                                                                                                        | 2/72 (2.8)   |
| Somewhat supportive                                                                                                                                                        | 6/72 (8.3)   |
| Very supportive                                                                                                                                                            | 56/72 (77.8) |
| <b>Set 3 (after last visit)</b>                                                                                                                                            |              |

|                                                                                                                                                                                                                                                             |                                                                        |
|-------------------------------------------------------------------------------------------------------------------------------------------------------------------------------------------------------------------------------------------------------------|------------------------------------------------------------------------|
| 1. How have you found the quality of your general pregnancy care?<br>Very low quality<br>Low quality<br>Neither high or low quality<br>High quality<br>Very high quality                                                                                    | 0/63 (0.0)<br>1/63 (1.6)<br>4/63 (6.3)<br>13/63 (20.6)<br>45/63 (71.4) |
| 2. How have you found the quality of your care through the Preterm Birth Clinic?<br>Very low quality<br>Low quality<br>Neither high or low quality<br>High quality<br>Very high quality                                                                     | 0/63 (0.0)<br>1/63 (1.6)<br>1/63 (1.6)<br>12/63 (19.0)<br>49/63 (77.8) |
| 3. Do you think that being seen in a preterm birth clinic made you more or less anxious about your pregnancy?<br>Significantly more anxious<br>Somewhat more anxious<br>Neither more or less anxious<br>Somewhat less anxious<br>Significantly less anxious | 2/63 (3.2)<br>2/63 (3.2)<br>3/63 (4.8)<br>14/63 (22.2)<br>42/63 (66.7) |
| 4. If you have another pregnancy, would you want to be cared for through a preterm birth clinic again?<br>Yes<br>No<br>Unsure                                                                                                                               | 55/63 (87.3)<br>7/63 (11.1)<br>1/63 (1.6)                              |

GP, general practitioner.

Denominator reflects numbered of respondents that answered each individual question.

<sup>a</sup> Only answered if responded 'Yes' to question 1.

<sup>b</sup> Only answered if responded 'Yes' to question 3.

1  
2  
3  
4  
5  
6  
7  
8  
9  
10  
11  
12  
13  
14  
15  
16  
17  
18  
19  
20  
21  
22  
23  
24  
25  
26  
27  
28  
29  
30  
31  
32  
33  
34  
35  
36  
37  
38  
39  
40  
41  
42  
43  
44  
45  
46  
47  
48  
49  
50  
51  
52  
53  
54  
55  
56  
57  
58  
59  
60

For peer review only



## References for Supplementary Material

1. Auckland District Health Board. Referral to the National Women's Health Preterm Birth Clinic Auckland: Auckland District Health Board; 2019. Available from: <http://nationalwomenshealth.adhb.govt.nz/assets/Uploads/PTB-Clinic-Referral-Guidelines-ACH-May2019.pdf>
2. Vernet G, Watson H, Ridout A, Shennan A. The Role of PTB Clinics: A Review of the Screening Methods, Interventions and Evidence for Preterm Birth Surveillance Clinics for High-Risk Asymptomatic Women. *Women Health Bull.* 2017;4(4):e12667.
3. Kuhrt K, Smout E, Hezelgrave N, Seed PT, Carter J, Shennan AH. Development and validation of a tool incorporating cervical length and quantitative fetal fibronectin to predict spontaneous preterm birth in asymptomatic high-risk women. *Ultrasound in Obstetrics & Gynecology.* 2016;47(1):104-9.

## STROBE Statement—checklist of items that should be included in reports of observational studies

|                              | Item No | Recommendation                                                                                                                                                                       | Page No |
|------------------------------|---------|--------------------------------------------------------------------------------------------------------------------------------------------------------------------------------------|---------|
| <b>Title and abstract</b>    | 1       | (a) Indicate the study's design with a commonly used term in the title or the abstract                                                                                               | 1       |
|                              |         | (b) Provide in the abstract an informative and balanced summary of what was done and what was found                                                                                  | 2       |
| <b>Introduction</b>          |         |                                                                                                                                                                                      |         |
| Background/rationale         | 2       | Explain the scientific background and rationale for the investigation being reported                                                                                                 | 5       |
| Objectives                   | 3       | State specific objectives, including any prespecified hypotheses                                                                                                                     | 5       |
| <b>Methods</b>               |         |                                                                                                                                                                                      |         |
| Study design                 | 4       | Present key elements of study design early in the paper                                                                                                                              | 6-7     |
| Setting                      | 5       | Describe the setting, locations, and relevant dates, including periods of recruitment, exposure, follow-up, and data collection                                                      | 6-7     |
| Participants                 | 6       | (a) <i>Cohort study</i> —Give the eligibility criteria, and the sources and methods of selection of participants. Describe methods of follow-up                                      | 6-7     |
|                              |         | (b) <i>Cohort study</i> —For matched studies, give matching criteria and number of exposed and unexposed                                                                             | N/A     |
| Variables                    | 7       | Clearly define all outcomes, exposures, predictors, potential confounders, and effect modifiers. Give diagnostic criteria, if applicable                                             | 5,8     |
| Data sources/<br>measurement | 8*      | For each variable of interest, give sources of data and details of methods of assessment (measurement). Describe comparability of assessment methods if there is more than one group | 6-7     |
| Bias                         | 9       | Describe any efforts to address potential sources of bias                                                                                                                            | 8       |
| Study size                   | 10      | Explain how the study size was arrived at                                                                                                                                            | 7-8     |
| Quantitative variables       | 11      | Explain how quantitative variables were handled in the analyses. If applicable, describe which groupings were chosen and why                                                         | 8       |
| Statistical methods          | 12      | (a) Describe all statistical methods, including those used to control for confounding                                                                                                | 8       |
|                              |         | (b) Describe any methods used to examine subgroups and interactions                                                                                                                  | N/A     |
|                              |         | (c) Explain how missing data were addressed                                                                                                                                          | 19      |
|                              |         | (d) <i>Cohort study</i> —If applicable, explain how loss to follow-up was addressed                                                                                                  | 19      |
|                              |         | (e) Describe any sensitivity analyses                                                                                                                                                | N/A     |

Continued on next page

| <b>Results</b>           |     |                                                                                                                                                                                                              |       |
|--------------------------|-----|--------------------------------------------------------------------------------------------------------------------------------------------------------------------------------------------------------------|-------|
| Participants             | 13* | (a) Report numbers of individuals at each stage of study—eg numbers potentially eligible, examined for eligibility, confirmed eligible, included in the study, completing follow-up, and analysed            | Fig 1 |
|                          |     | (b) Give reasons for non-participation at each stage                                                                                                                                                         | Fig 1 |
|                          |     | (c) Consider use of a flow diagram                                                                                                                                                                           | Fig 1 |
| Descriptive data         | 14* | (a) Give characteristics of study participants (eg demographic, clinical, social) and information on exposures and potential confounders                                                                     | 9-10  |
|                          |     | (b) Indicate number of participants with missing data for each variable of interest                                                                                                                          | 9-10  |
|                          |     | (c) <i>Cohort study</i> —Summarise follow-up time (eg, average and total amount)                                                                                                                             | 10    |
| Outcome data             | 15* | <i>Cohort study</i> —Report numbers of outcome events or summary measures over time                                                                                                                          | 11-12 |
| Main results             | 16  | (a) Give unadjusted estimates and, if applicable, confounder-adjusted estimates and their precision (eg, 95% confidence interval). Make clear which confounders were adjusted for and why they were included | 11-12 |
|                          |     | (b) Report category boundaries when continuous variables were categorized                                                                                                                                    | 11    |
|                          |     | (c) If relevant, consider translating estimates of relative risk into absolute risk for a meaningful time period                                                                                             | N/A   |
| Other analyses           | 17  | Report other analyses done—eg analyses of subgroups and interactions, and sensitivity analyses                                                                                                               | N/A   |
| <b>Discussion</b>        |     |                                                                                                                                                                                                              |       |
| Key results              | 18  | Summarise key results with reference to study objectives                                                                                                                                                     | 16-17 |
| Limitations              | 19  | Discuss limitations of the study, taking into account sources of potential bias or imprecision. Discuss both direction and magnitude of any potential bias                                                   | 18-19 |
| Interpretation           | 20  | Give a cautious overall interpretation of results considering objectives, limitations, multiplicity of analyses, results from similar studies, and other relevant evidence                                   | 18-19 |
| Generalisability         | 21  | Discuss the generalisability (external validity) of the study results                                                                                                                                        | 19    |
| <b>Other information</b> |     |                                                                                                                                                                                                              |       |
| Funding                  | 22  | Give the source of funding and the role of the funders for the present study and, if applicable, for the original study on which the present article is based                                                | 20    |
